# Supplementary material for: Optimization of a “bump-and-hole” approach to allele-selective BET bromodomain inhibition
Source: Royal Society of Chemistry journal article supplement (doi:10.1039/c7sc02536j), 2018-01-01
Supplement: c7sc02536j1.pdf [file c7sc02536j1.pdf]

## Optimization of a “Bump-and-Hole” Approach to Allele-Selective BET Bromodomain Inhibition

A. C. Runcie<sup>a†</sup>, M. Zengerle<sup>a†</sup>, K.-H. Chan<sup>a†</sup>, A. Testa<sup>a</sup>, L. van Beurden<sup>a</sup>, M. G. J. Baud<sup>a</sup>, O. Epemolu<sup>a</sup>, L. C.J. Ellis<sup>a</sup>, K. D. Read<sup>a</sup>, V. Coulthard<sup>b</sup>, A. Brien<sup>b</sup>, A. Ciulli<sup>a\*</sup>

<sup>a</sup> Division of Biological Chemistry and Drug Discovery, School of Life Sciences, University of Dundee, Dundee, Scotland, UK.

<sup>b</sup> Reach Separations Ltd, BioCity Nottingham, Nottingham, UK.

### Supplementary Information

|                                                                |     |
|----------------------------------------------------------------|-----|
| Supplementary Figures & Tables                                 | S2  |
| X-Ray Crystallography: Data Collection & Refinement Statistics | S20 |
| Materials & Methods                                            | S22 |
| Compound Synthesis & Characterization                          | S26 |
| Supplemental References                                        | S38 |

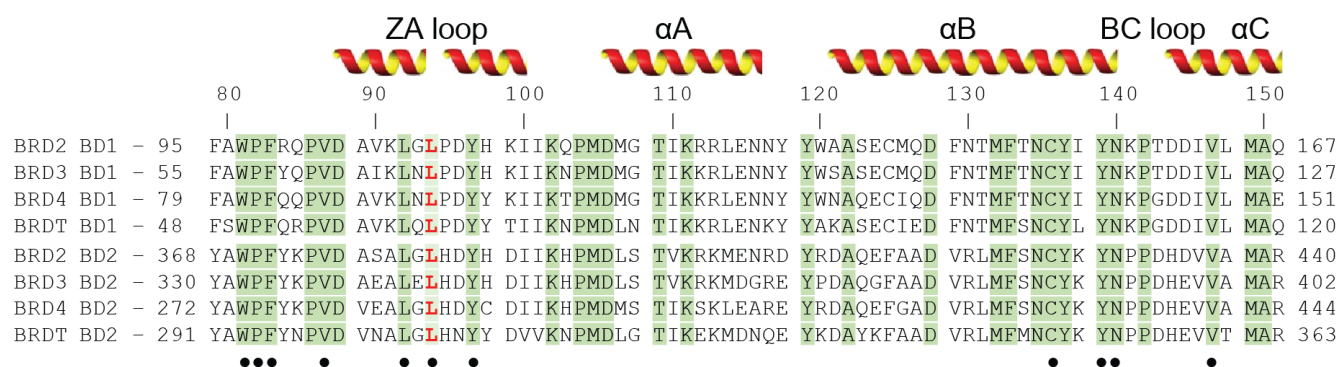

**Figure S1 – BET Bromodomain Sequence alignment**

Sequence alignment of the eight human BET bromodomains, with positions of  $\alpha$ -helices and associated loops. Conserved residues highlighted in green, with mutated leucine in red. Conserved residues making direct contact with I-BET shown with black dot. Ruler numbering based on BRD4 BD1 sequence.

| Bromodomain | T <sub>m</sub> (°C) $\pm$ SE |              |              | $\Delta$ T <sub>m</sub> (°C) $\pm$ SE |              |
|-------------|------------------------------|--------------|--------------|---------------------------------------|--------------|
|             | WT                           | L/V          | L/A          | L/V                                   | L/A          |
| BRD2 BD1    | 45 $\pm$ 0.0                 | 43 $\pm$ 0.6 | 45 $\pm$ 0.5 | -2 $\pm$ 0.6                          | -1 $\pm$ 0.6 |
| BRD2 BD2    | 49 $\pm$ 0.1                 | 48 $\pm$ 0.1 | 48 $\pm$ 0.3 | -1 $\pm$ 0.1                          | -1 $\pm$ 0.3 |
| BRD3 BD1    | 46 $\pm$ 0.1                 | 43 $\pm$ 0.2 | 44 $\pm$ 0.1 | -3 $\pm$ 0.2                          | -2 $\pm$ 0.1 |
| BRD3 BD2    | 44 $\pm$ 0.1                 | 45 $\pm$ 0.9 | 44 $\pm$ 0.0 | 1 $\pm$ 0.9                           | 0 $\pm$ 0.1  |
| BRD4 BD1    | 43 $\pm$ 0.2                 | 41 $\pm$ 0.2 | 44 $\pm$ 0.2 | -2 $\pm$ 0.3                          | 0 $\pm$ 0.3  |
| BRD4 BD2    | 46 $\pm$ 0.1                 | 45 $\pm$ 0.3 | 43 $\pm$ 0.1 | -1 $\pm$ 0.3                          | -4 $\pm$ 0.1 |
| BRDT BD1    | 45 $\pm$ 0.2                 | 45 $\pm$ 0.1 | 43 $\pm$ 0.2 | 1 $\pm$ 0.2                           | -1 $\pm$ 0.3 |
| BRDT BD2    | 44 $\pm$ 0.1                 | 42 $\pm$ 1.6 | 47 $\pm$ 0.1 | -2 $\pm$ 1.6                          | 3 $\pm$ 0.2  |

**Table S1 – Thermal Stability of BET Bromodomain Constructs**

Differential Scanning Fluorimetry –derived melting points of WT, L/V and L/A BET bromodomains. Mean and standard error of three replications.

| H4 K5,8ac             | BRD2 BD1 |       | BRD2 BD2 |      | BRD3 BD1 |       | BRD3 BD2 |       | BRD4 BD1 |       | BRD4 BD2 |      | BRDT BD1 |       |
|-----------------------|----------|-------|----------|------|----------|-------|----------|-------|----------|-------|----------|------|----------|-------|
|                       | WT       | L/V   | WT       | L/V  | WT       | L/V   | WT       | L/V   | WT       | L/V   | WT       | L/V  | WT       | L/V   |
| Kd ( $\mu$ M)         | 31       | 42    | 91       | 138  | 18       | 22    | 105      | 154   | 8        | 10    | 83       | 198  | 23       | 40    |
| SE                    | 2        | 3     | 19       | 16   | 1        | 1     | 12       | 16    | 1        | 1     | 2        | 22   | 4        | 8     |
| $\Delta H$ (kcal/mol) | -8.8     | -9.8  | -1.7     | -1.4 | -9.4     | -10.7 | -6.7     | -11.6 | -10.5    | -10.9 | -4.1     | -5.6 | -14.4    | -16.9 |
| SE                    | 0.2      | 0.5   | 0.2      | 0.2  | 0.1      | 0.2   | 1.1      | 5.7   | 0.1      | 0.1   | 0.1      | 0.9  | 1.4      | 3.0   |
| N                     | 2.1      | 1.8   | 2.3      | 2.0  | 2.0      | 1.7   | 1.2      | 0.5   | 1.7      | 1.7   | 1.4      | 1.6  | 1.3      | 1.1   |
| SE                    | 0.04     | 0.06  | 1.14     | 0.17 | 0.02     | 0.02  | 0.18     | 0.22  | 0.02     | 0.01  | 0.02     | 0.21 | 0.10     | 0.16  |
|                       |          |       |          |      |          |       |          |       |          |       |          |      |          |       |
| H4 K5,8,12,16ac       | BRD2 BD1 |       | BRD2 BD2 |      | BRD3 BD1 |       | BRD3 BD2 |       | BRD4 BD1 |       | BRD4 BD2 |      | BRDT BD1 |       |
|                       | WT       | L/V   | WT       | L/V  | WT       | L/V   | WT       | L/V   | WT       | L/V   | WT       | L/V  | WT       | L/V   |
| Kd ( $\mu$ M)         | 16       | 34    | 133      | 169  | 20       | 36    | 63       | 128   | 9        | 13    | 83       | 138  | 15       | 33    |
| SE                    | 1        | 1     | 7        | 12   | 1        | 3     | 6        | 7     | 1        | 1     | 3        | 10   | 1        | 4     |
| $\Delta H$ (kcal/mol) | -11.9    | -15.7 | -6.3     | -3.8 | -9.1     | -10.5 | -9.3     | -7.0  | -9.7     | -9.8  | -8.3     | -7.3 | -14.8    | -14.9 |
| SE                    | 0.1      | 0.2   | 0.4      | 0.3  | 0.1      | 0.3   | 0.9      | 1.0   | 1.8      | 0.1   | 0.2      | 0.4  | 0.4      | 1.0   |
| N                     | 1.1      | 1.2   | 1.1      | 1.5  | 2.3      | 2.0   | 0.9      | 1.0   | 1.8      | 1.6   | 0.9      | 1.1  | 1.3      | 1.1   |
| SE                    | 0.01     | 0.01  | 0.05     | 0.08 | 0.01     | 0.03  | 0.08     | (FIX) | 0.02     | 0.02  | 0.02     | 0.04 | 0.02     | 0.06  |

**Table S2 – Effect of L/V Mutation on BRD:Peptide Affinity**

Results of ITC titrations of di- and tetra-acetylated H4 peptides titrated into WT and L/V BET bromodomains.

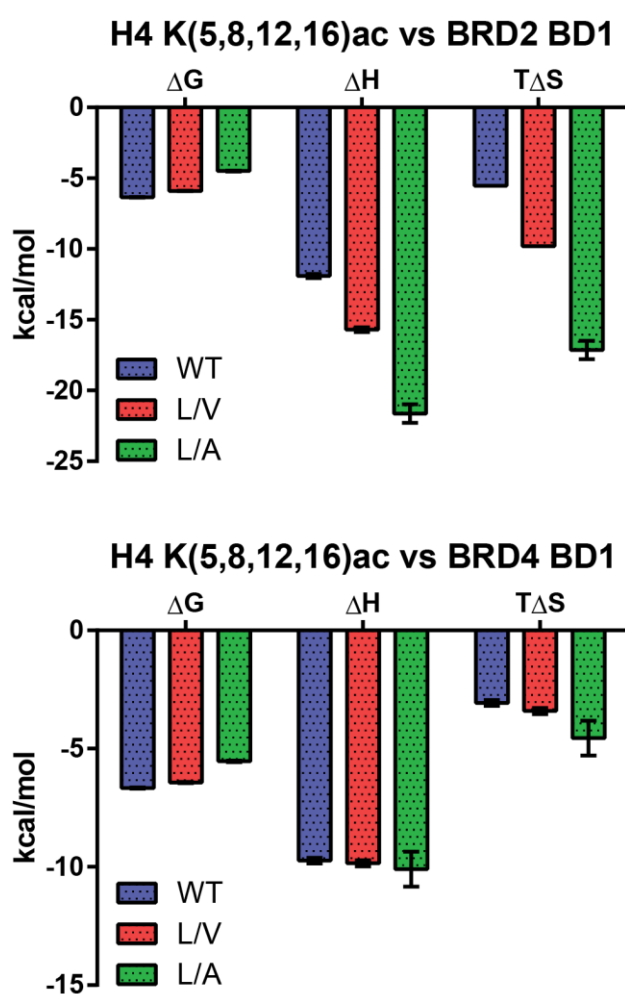

**Figure S2 – Effect of L/V Mutation on Binding Energies of BRD:Peptide Interactions**

Thermodynamic measurements of tetra-acetylated H4 peptide titrated into WT and mutant BET bromodomains.

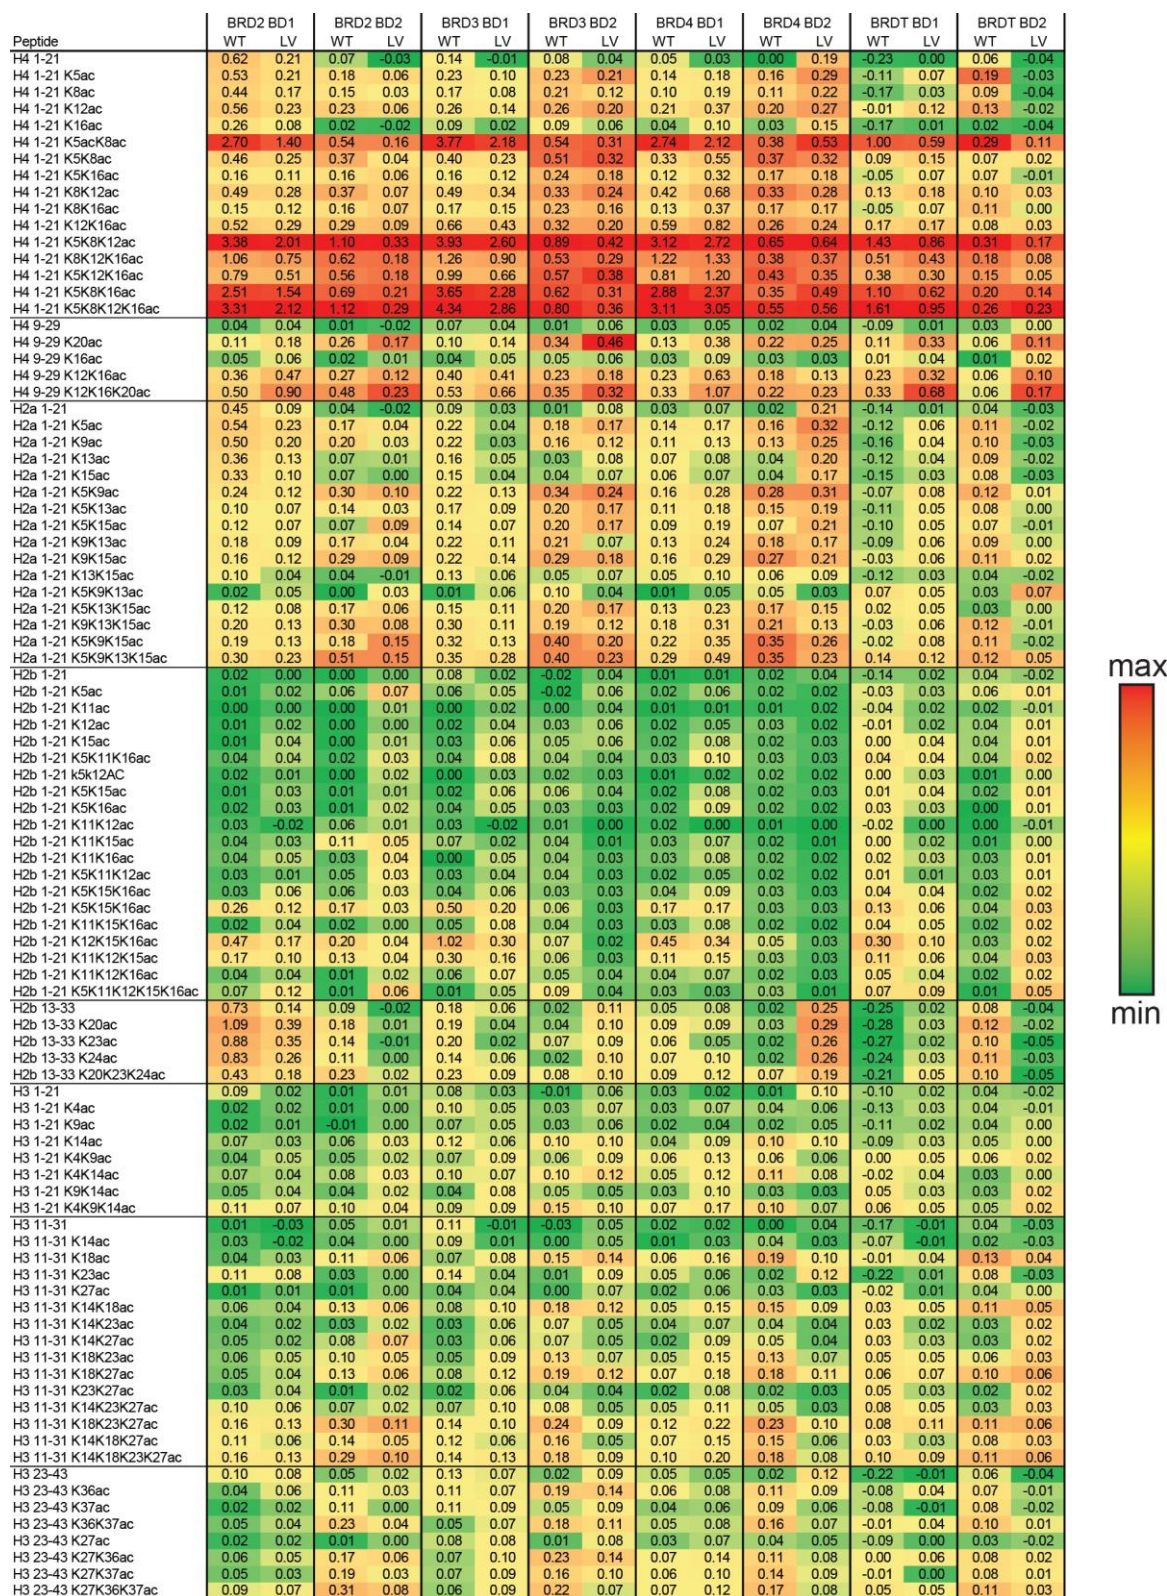



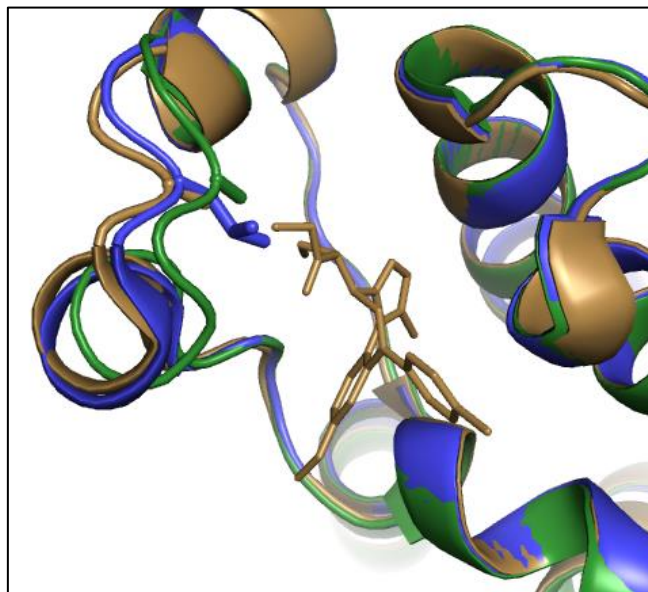

**Figure S4 – Crystallographic Analysis of ZA Loop during Binding**

Aligned X-ray crystal structures of BRD2 BD2 L/A apo (green) (4QEU) and bound to ET (brown) (4QEW), as well as BRD2 BD2 WT bound to an acetylated H4 peptide (blue) (2E3K). Bound peptide not shown. Mutated leucine/alanine side-chain highlighted.

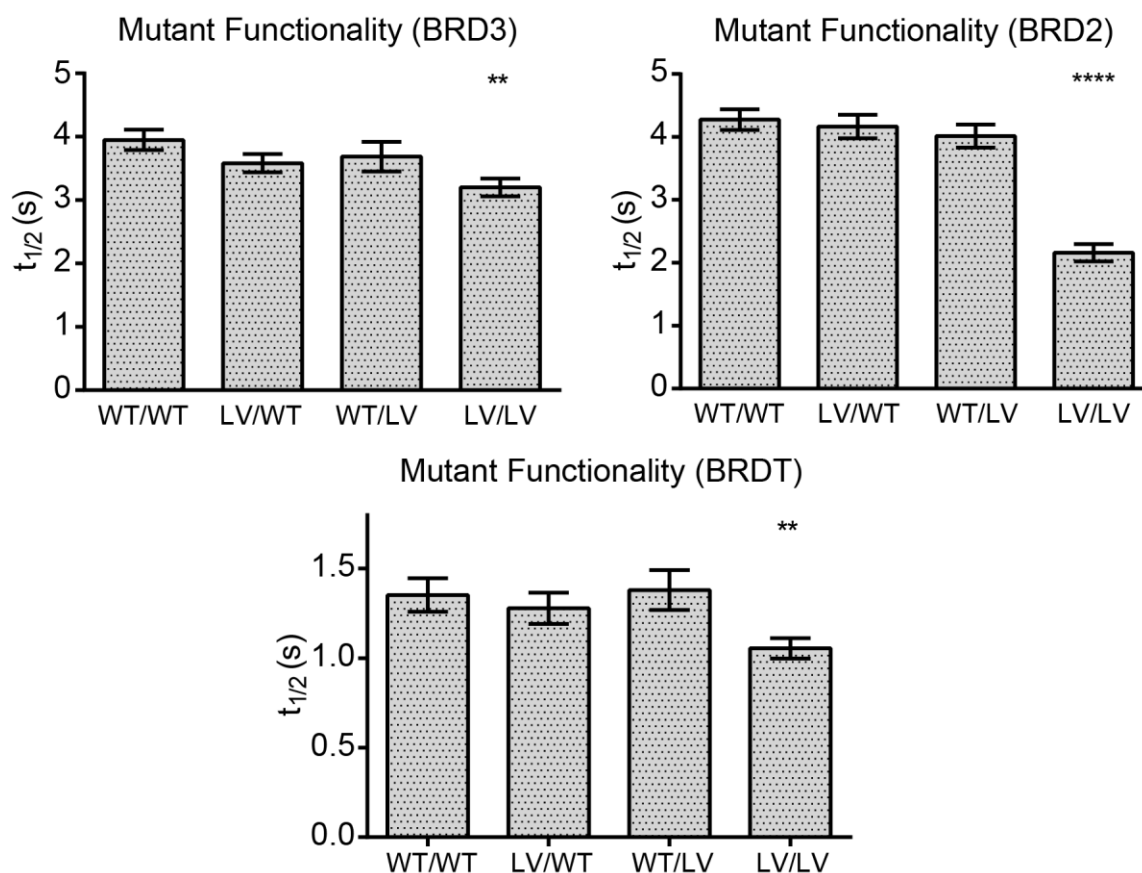

**Figure S5 – Effect of L/V Mutation on BET Protein Construct's FRAP Recovery Times**

Recovery times of GFP-labelled BET bromodomain constructs in FRAP assay, following 0.5s laser bleach event, at 2  $\mu$ M SAHA. Each bar is mean and SE of ~50 U2OS cells tested over two separate experiments. Statistical significance determined with two-tailed  $t$  tests: ns  $P > 0.05$ ; \*  $P \leq 0.05$ , \*\*  $P \leq 0.01$ , \*\*\*  $P \leq 0.001$ , \*\*\*\*  $P < 0.0001$ .

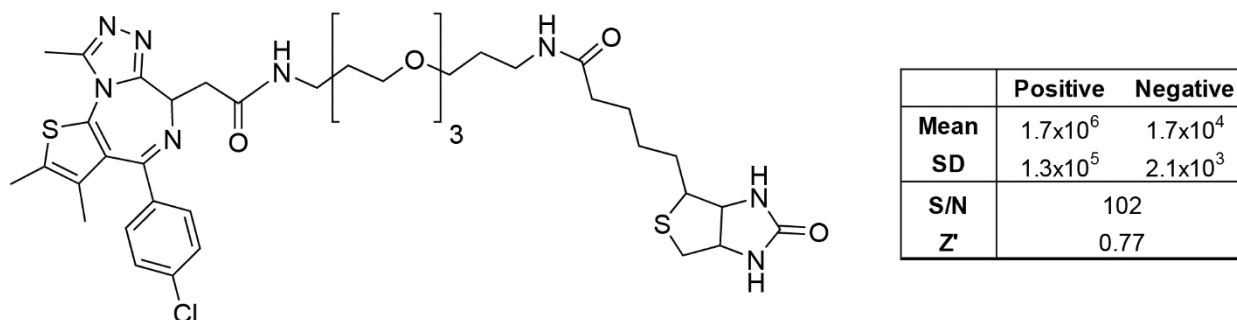

**Figure S6 – Structure of Biotinylated-JQ1 and Associated Assay Robustness**

Structure of biotinylated JQ1. Z' calculated using BRD2 BD2 WT with 0 and 300  $\mu\text{M}$  JQ1 (positive and negative controls) (12 replicates).

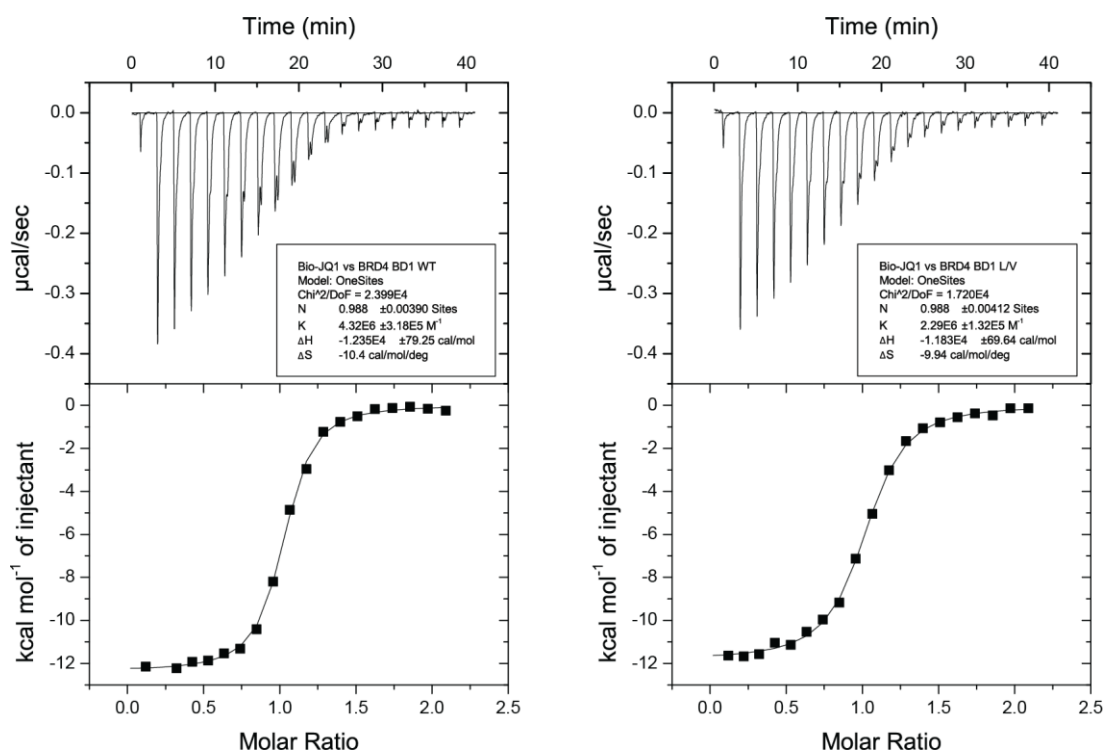

**Figure S7 – ITC Titrations of Biotinylated-JQ1**

ITC Titrations of biotinylated JQ1 into WT and L/V BRD4 BD1.

| Bio-JQ1               | BRD2 BD1 |         | BRD2 BD2 |         | BRD3 BD1 |         | BRD3 BD2 |         | BRD4 BD1 |         | BRD4 BD2 |         | BRDT BD1 |         | BRDT BD2 |         |
|-----------------------|----------|---------|----------|---------|----------|---------|----------|---------|----------|---------|----------|---------|----------|---------|----------|---------|
|                       | WT       | L/V     | WT       | L/V     | WT       | L/V     | WT       | L/V     | WT       | L/V     | WT       | L/V     | WT       | L/V     | WT       | L/V     |
| EC <sub>50</sub> (nM) | 1.4      | 3.2     | 2.3      | 1.8     | 0.9      | 1.2     | 1.9      | 4.0     | 1.0      | 2.0     | 1.3      | 2.9     | 3.2      | 4.0     | 3.1      | 4.9     |
| 95% C.I.              | 1.0-2.6  | 1.2-2.1 | 1.6-3.2  | 1.6-2.2 | 0.6-1.3  | 1.1-1.4 | 1.7-2.3  | 3.7-4.4 | 0.7-1.5  | 1.6-2.6 | 0.8-2.2  | 2.7-3.8 | 2.7-3.7  | 3.7-4.4 | 2.4-3.9  | 3.9-6.1 |
| LV/WT                 | 2.3      |         | 0.8      |         | 1.3      |         | 2.1      |         | 2.0      |         | 2.2      |         | 1.3      |         | 1.6      |         |

**Table S3 – AlphaLISA Titrations of Biotinylated-JQ1**

Results of dose-response curves of JPB titrated against 100 nM WT and L/V BET bromodomains. Data points after the 'hook' point excluded from analysis

| Compound | AlphaLISA pIC <sub>50</sub> Value |     |          |     |          |     |          |     |          |     |          |     |          |     |          |     |
|----------|-----------------------------------|-----|----------|-----|----------|-----|----------|-----|----------|-----|----------|-----|----------|-----|----------|-----|
|          | BRD2 BD1                          |     | BRD2 BD2 |     | BRD3 BD1 |     | BRD3 BD2 |     | BRD4 BD1 |     | BRD4 BD2 |     | BRDT BD1 |     | BRDT BD2 |     |
|          | WT                                | L/V | WT       | L/V | WT       | L/V | WT       | L/V | WT       | L/V | WT       | L/V | WT       | L/V | WT       | L/V |
| (+)JQ1   | 6.4                               | 6.5 | 6.5      | 6.5 | 6.8      | 6.6 | 6.5      | 6.4 | 6.6      | 6.5 | 6.5      | 6.4 | 6.6      | 6.0 | 6.3      | 6.1 |
| (-)JQ1   | 4.8                               | 4.8 | 4.8      | 4.4 | 5.0      | 5.0 | 4.6      | 4.4 | 4.9      | 4.6 | 4.7      | 4.5 | 4.7      | 4.6 | 4.6      | 4.6 |
| I-BET    | 6.2                               | 6.1 | 6.3      | 6.7 | 6.7      | 6.9 | 6.6      | 6.3 | 6.6      | 6.3 | 6.5      | 6.5 | 6.3      | 6.0 | 6.3      | 6.3 |
| 1        | 6.5                               | 6.6 | 6.5      | 6.5 | 6.9      | 7.2 | 6.6      | 6.3 | 6.9      | 6.6 | 6.4      | 6.6 | 6.3      | 6.2 | 6.6      | 6.0 |
| 2        | 5.7                               | 5.8 | 5.6      | 5.7 | 6.2      | 6.3 | 5.6      | 6.0 | 6.0      | 6.0 | 5.6      | 5.6 | 5.7      | 5.8 | 5.4      | 5.5 |
| 3        | 5.7                               | 7.2 | 6.0      | 7.3 | 6.6      | 7.5 | 6.3      | 7.5 | 6.2      | 7.4 | 6.1      | 7.3 | 5.7      | 7.3 | 5.9      | 7.1 |
| 4        | 4.9                               | 6.5 | 5.0      | 6.8 | 5.2      | 7.0 | 5.0      | 7.0 | 5.1      | 6.6 | 4.9      | 6.6 | 4.8      | 6.3 | 4.8      | 6.2 |
| 5        | 5.0                               | 6.0 | 5.0      | 6.8 | 5.4      | 6.9 | 5.0      | 6.9 | 5.1      | 6.5 | 5.0      | 6.6 | 4.7      | 5.7 | 4.9      | 6.2 |
| 6        | 4.5                               | 5.0 | <4       | 5.0 | 4.7      | 5.2 | 4.7      | 5.0 | 4.6      | 5.1 | 4.2      | 4.9 | 4.5      | 4.6 | 4.9      | 6.2 |
| 7        | 5.5                               | 6.7 | 5.1      | 6.5 | 5.8      | 7.0 | 5.3      | 7.0 | 5.5      | 6.7 | 5.2      | 6.7 | 5.3      | 6.6 | 5.1      | 6.2 |
| 8        | 5.0                               | 6.5 | 5.4      | 6.7 | 5.6      | 6.9 | 5.4      | 7.1 | 5.8      | 6.9 | 5.5      | 6.7 | 4.8      | 6.2 | 5.4      | 6.4 |
| 9        | 4.3                               | 5.4 | 4.4      | 5.9 | 4.5      | 5.8 | 4.3      | 6.0 | 4.4      | 5.5 | 4.2      | 5.5 | 4.2      | 5.2 | 4.3      | 5.3 |
| 16       | 4.9                               | 6.4 | 5.3      | 6.6 | 5.7      | 7.0 | 5.4      | 7.1 | 5.4      | 6.6 | 5.3      | 6.6 | 4.9      | 6.2 | 5.1      | 6.4 |
| 17       | 4.2                               | 5.5 | 4.6      | 5.9 | 4.5      | 6.3 | 4.4      | 6.1 | 4.3      | 5.7 | 4.2      | 5.7 | 4.2      | 4.9 | 4.1      | 5.3 |
| 18       | 4.3                               | 5.6 | 4.3      | 6.0 | 4.5      | 6.1 | 4.3      | 5.9 | 4.4      | 5.9 | 4.2      | 5.7 | 4.1      | 5.3 | 4.1      | 5.3 |
| 19       | 4.9                               | 6.0 | 4.6      | 6.0 | 5.3      | 6.4 | 4.9      | 6.3 | 4.9      | 5.9 | 4.6      | 5.9 | 4.4      | 5.4 | 4.6      | 5.5 |
| 20       | 4.5                               | 5.7 | 4.8      | 5.8 | 4.7      | 6.3 | 4.6      | 5.8 | 4.6      | 5.9 | 4.5      | 5.5 | 4.4      | 5.2 | 4.4      | 5.2 |
| 21       | 4.4                               | 5.7 | 4.8      | 6.0 | 5.3      | 6.3 | 4.8      | 6.3 | 4.6      | 6.0 | 4.5      | 5.9 | 4.3      | 5.6 | 4.6      | 5.8 |
| 22       | <4                                | 5.2 | <4       | 5.1 | 4.2      | 5.5 | <4       | 5.4 | 4.2      | 5.1 | <4       | 4.9 | <4       | 4.7 | <4       | 4.7 |
| 23       | 5.3                               | 5.8 | 5.3      | 6.0 | 5.6      | 6.4 | 5.3      | 6.1 | 5.3      | 6.1 | 5.2      | 5.8 | 5.2      | 5.6 | 5.2      | 5.6 |
| 24       | 5.3                               | 5.9 | 5.1      | 6.3 | 5.4      | 6.5 | 5.2      | 6.1 | 5.3      | 6.2 | 5.4      | 6.0 | 5.1      | 5.7 | 5.0      | 5.8 |
| 25       | 4.4                               | 5.0 | 4.7      | 4.9 | 4.7      | 5.3 | 4.6      | 5.0 | 4.8      | 5.1 | 4.6      | 4.7 | 4.6      | 4.9 | 4.4      | 4.9 |
| 26       | 5.1                               | 5.6 | 5.2      | 5.8 | 5.5      | 5.9 | 5.3      | 5.9 | 5.2      | 5.8 | 5.0      | 5.5 | 5.0      | 5.4 | 5.0      | 5.6 |

**Table S4- Results of AlphaLISA Assay Screen**

| Compound | AlphaLISA pIC <sub>50</sub> |     |      | Plasma t <sub>1/2</sub><br>(mins) | CL <sub>int</sub><br>(ml/min/g) | P <sub>e</sub><br>(nm/s) | CLogP | ITC pKd |     |      |
|----------|-----------------------------|-----|------|-----------------------------------|---------------------------------|--------------------------|-------|---------|-----|------|
|          | WT                          | L/V | Δ    |                                   |                                 |                          |       | WT      | L/V | Δ    |
| (+) JQ1  | 6.6                         | 6.5 | -0.1 | >180                              | 7.5                             |                          | 4.8   |         |     |      |
| (-) JQ1  | 4.8                         | 4.6 | -0.2 |                                   |                                 |                          | 4.8   |         |     |      |
| I-BET762 | 6.5                         | 6.5 | 0.0  | >180                              | 1.3                             | 25                       | 2.8   |         |     |      |
| 1        | 6.6                         | 6.6 | 0.0  | 54                                | <0.5                            | 149                      | 3.3   |         |     |      |
| 2        | 5.8                         | 5.9 | 0.1  | 67                                | 1.7                             |                          | 3.3   |         |     |      |
| 3        | 6.2                         | 7.4 | 1.2  | >180                              | 0.7                             | 185                      | 3.5   |         |     |      |
| 4        | 5.0                         | 6.8 | 1.7  | >180                              | 1.5                             | 153                      | 3.9   | 5.1     | 6.9 | 1.8  |
| 5        | 5.1                         | 6.6 | 1.5  | >180                              | 6.7                             | 127                      | 3.9   | 5.1     | 6.6 | 1.5  |
| 6        | 4.5                         | 5.0 | 0.6  | >180                              | 5.2                             |                          | 4.3   |         |     |      |
| 7        | 5.4                         | 6.8 | 1.4  | >180                              | <0.5                            | 158                      | 3.5   | 4.5     | 6.6 | 2.0  |
| 8        | 5.5                         | 6.8 | 1.4  | >180                              | 4.1                             | 155                      | 3.9   | <4.2    | 6.4 | >2.2 |
| 9        | 4.4                         | 5.7 | 1.3  | >180                              | 9.4                             | 136                      | 3.9   |         |     |      |
| 16       | 5.3                         | 6.7 | 1.4  | >180                              | 1.2                             | 26                       | 3.1   | 5.6     | 6.9 | 1.3  |
| 17       | 4.4                         | 5.9 | 1.5  | >180                              | 1.4                             | 45                       | 3.5   | <4.2    | 6.0 | >1.8 |
| 18       | 4.3                         | 5.9 | 1.5  | >180                              | 2.6                             | 52                       | 3.5   |         |     |      |
| 19       | 4.9                         | 6.1 | 1.2  | >180                              | >50                             |                          | 3.8   |         |     |      |
| 20       | 4.6                         | 5.8 | 1.2  | >180                              | >50                             |                          | 4.1   |         |     |      |
| 21       | 4.7                         | 6.0 | 1.3  | >180                              | 1.5                             | 40                       | 3.1   | 4.5     | 6.3 | 1.8  |
| 22       | <4.0                        | 5.2 |      | >180                              | 2.1                             | 59                       | 3.5   |         |     |      |
| 23       | 5.3                         | 6.0 | 0.7  | >180                              | 30.7                            |                          | 4.8   |         |     |      |
| 24       | 5.3                         | 6.2 | 0.9  | >180                              | 39.7                            |                          | 4.9   |         |     |      |
| 25       | 4.6                         | 5.0 | 0.4  | >180                              | 31.0                            |                          | 4.8   |         |     |      |
| 26       | 5.2                         | 5.8 | 0.5  | >180                              | 39.4                            |                          | 4.9   |         |     |      |

4.0

7.0

0.0

2.2

**Figure S8. Color-Coded SAR**

Data from table 1, with potency/selectivity data color-coded.



| Compound  |                     | BRD2 BD1       |               | BRD2 BD2      |               | BRD3 BD1      |               | BRD3 BD2       |               | BRD4 BD1       |               | BRD4 BD2        |               |
|-----------|---------------------|----------------|---------------|---------------|---------------|---------------|---------------|----------------|---------------|----------------|---------------|-----------------|---------------|
|           |                     | WT             | L/V           | WT            | L/V           | WT            | L/V           | WT             | L/V           | WT             | L/V           | WT              | L/V           |
| <b>4</b>  | K <sub>d</sub> (nM) | 22000<br>±9000 | 240<br>±50    | 3300<br>±1400 | 50<br>±10     | 3300<br>±1000 | 80<br>±10     | 16000<br>±8000 | 100<br>±30    | 2500<br>±1000  | 160<br>±10    | 35000<br>±10000 | 330<br>±50    |
|           | ΔH (kcal/mol)       | -5.3<br>±0.9   | -12.6<br>±0.2 | -1.2<br>±0.1  | -8.5<br>±0.1  | -4.9<br>±0.4  | -14.1<br>±0.1 | -3.8<br>±1.4   | -9.5<br>±0.2  | -2.6<br>±0.2   | -10.3<br>±0.1 | -3.4<br>±0.5    | -7.9<br>±0.1  |
|           | N                   | 1<br>(FIX)     | 0.96<br>±0.01 | 0.91<br>±0.07 | 0.85<br>±0.01 | 0.81<br>±0.05 | 0.94<br>±0.00 | 0.85<br>±0.20  | 0.94<br>±0.01 | 0.99<br>±0.06  | 0.87<br>±0.00 | 1<br>(FIX)      | 0.82<br>±0.01 |
| <b>5</b>  | K <sub>d</sub> (nM) | 8400<br>±3400  | 470<br>±100   | 5800<br>±600  | 240<br>±60    | 1500<br>±600  | 270<br>±30    | 23000<br>±8000 | 310<br>±60    | 9700<br>±1800  | 180<br>±10    | 16000<br>±9000  | 170<br>±20    |
|           | ΔH (kcal/mol)       | -4.0<br>±0.7   | -10.3<br>±0.2 | -2.3<br>±0.1  | -5.9<br>±0.1  | -2.3<br>±0.2  | -11.3<br>±0.1 | -3.7<br>±0.6   | -8.5<br>±0.2  | -3.5<br>±0.3   | -7.4<br>±0.0  | -2.2<br>±0.8    | -6.4<br>±0.5  |
|           | N                   | 1.0<br>±0.10   | 0.87<br>±0.01 | 0.75<br>±0.02 | 1.16<br>±0.01 | 0.85<br>±0.05 | 0.84<br>±0.01 | 1<br>(FIX)     | 0.78<br>±0.01 | 1.10<br>±0.05  | 0.88<br>±0.00 | 0.98<br>±0.20   | 0.89<br>±0.01 |
| <b>16</b> | K <sub>d</sub> (nM) | 2200<br>±900   | 120<br>±20    | 2400<br>±500  | 190<br>±20    | 1600<br>±300  | 60<br>±10     | 1500<br>±300   | 130<br>±20    | 9400<br>±1100  | 160<br>±20    | 1700<br>±300    | 80<br>±10     |
|           | ΔH (kcal/mol)       | -4.5<br>±0.4   | -16.3<br>±0.2 | -3.9<br>±0.2  | -9.9<br>±0.1  | -8.8<br>±0.3  | -19.0<br>±0.2 | -6.0<br>±0.2   | -12.9<br>±0.2 | -10.2<br>±0.5  | -9.5<br>±0.1  | -3.6<br>±0.1    | -8.6<br>±0.1  |
|           | N                   | 0.94<br>±0.05  | 0.75<br>±0.01 | 0.65<br>±0.03 | 0.62<br>±0.00 | 0.81<br>±0.02 | 0.64<br>±0.00 | 0.88<br>±0.03  | 0.74<br>±0.01 | 0.96<br>±0.03  | 0.92<br>±0.01 | 0.81<br>±0.02   | 0.83<br>±0.00 |
| <b>17</b> | K <sub>d</sub> (nM) | >60000         | 960<br>±180   | >60000        | 1300<br>±200  | >60000        | 740<br>±130   | >60000         | 610 ±90       | >60000         | 1600<br>±300  | >60000          | 1000<br>±200  |
|           | ΔH (kcal/mol)       |                | -10.2<br>±0.3 |               | -5.3<br>±0.1  |               | -9.4<br>±0.2  |                | -4.7<br>±0.1  |                | -5.9<br>±0.2  |                 | -3.7<br>±0.1  |
|           | N                   |                | 0.97<br>±0.02 |               | 0.94<br>±0.01 |               | 1.07<br>±0.02 |                | 0.68<br>±0.01 |                | 0.99<br>±0.02 |                 | 0.99<br>±0.02 |
| <b>21</b> | K <sub>d</sub> (nM) | >60000         | 990<br>±50    | 7400<br>±600  | 230<br>±50    | 7400<br>±600  | 410<br>±20    | 11000<br>±3000 | 800<br>±50    | 39000<br>±6000 | 370<br>±50    | >60000          | 320<br>±20    |
|           | ΔH (kcal/mol)       |                | -8.8<br>±0.1  | -5.1<br>±0.2  | -4.8<br>±0.1  | -5.1<br>±0.2  | -10.7<br>±0.1 | -4.5<br>±1.3   | -6.7<br>±0.1  | -3.3<br>±0.3   | -5.9<br>±0.1  |                 | -4.4<br>±0.0  |
|           | N                   |                | 0.97<br>±0.01 | 0.86<br>±0.02 | 0.84<br>±0.03 | 0.86<br>±0.02 | 0.92<br>±0.00 | 0.46<br>±0.10  | 0.90<br>±0.01 | 1<br>(FIX)     | 0.88<br>±0.01 |                 | 1.06<br>±0.01 |

**Table S5 – Results of ITC Profiling**

Results of ITC titrations of compound titrated into BET bromodomains. For very weak interactions N value fixed to 1.0.

| <b>7</b> | L/V                 | 2.1  | 2.2  | 3.1  | 3.2  | 4.1  | 4.2 |  | <b>8</b> | L/V                 | 2.1  | 2.2  | 3.1  | 3.2  | 4.1  | 4.2 |
|----------|---------------------|------|------|------|------|------|-----|--|----------|---------------------|------|------|------|------|------|-----|
| WT       | K <sub>d</sub> (nM) | 310  | 330  | 140  | 230  | 140  | 980 |  | WT       | K <sub>d</sub> (nM) | 340  | 300  | 270  | 410  | 530  | 740 |
| 2.1      | 32000               | 100  | 100  | 230  | 140  | 230  | 30  |  | 2.1      | >60000              | >180 | >200 | >230 | >150 | >110 | >80 |
| 2.2      | >60000              | >190 | >180 | >430 | >260 | >430 | >60 |  | 2.2      | >60000              | >180 | >200 | >230 | >150 | >100 | >80 |
| 3.1      | 12000               | 40   | 40   | 90   | 50   | 90   | 10  |  | 3.1      | 29000               | 90   | 100  | 110  | 70   | 60   | 40  |
| 3.2      | 34000               | 110  | 100  | 240  | 150  | 240  | 40  |  | 3.2      | >60000              | >180 | >200 | >230 | >150 | >110 | >80 |
| 4.1      | 28000               | 90   | 90   | 200  | 120  | 200  | 30  |  | 4.1      | >60000              | >180 | >200 | >230 | >150 | >100 | >80 |
| 4.2      | 33000               | 110  | 100  | 240  | 140  | 240  | 30  |  | 4.2      | >60000              | >180 | >200 | >230 | >150 | >100 | >80 |

**Table S6. Selectivity Plots of 9-ME & 9-ET**

Results are means of three consistent ITC titrations of ligand into WT and L/V BET bromodomains. For some weak interactions N was fixed to 1

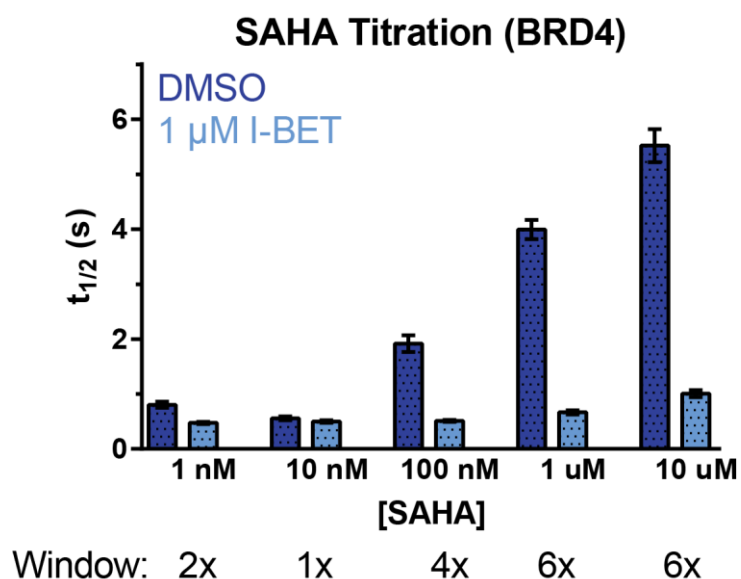

**Figure S9 – Effects of SAHA treatment on FRAP assay window.**

Recovery times of GFP-labelled BRD4 WT/WT in FRAP assay, following 0.5s laser bleach event, at a range of SAHA concentrations. Each bar is mean and SE of ~30 U2OS cells.

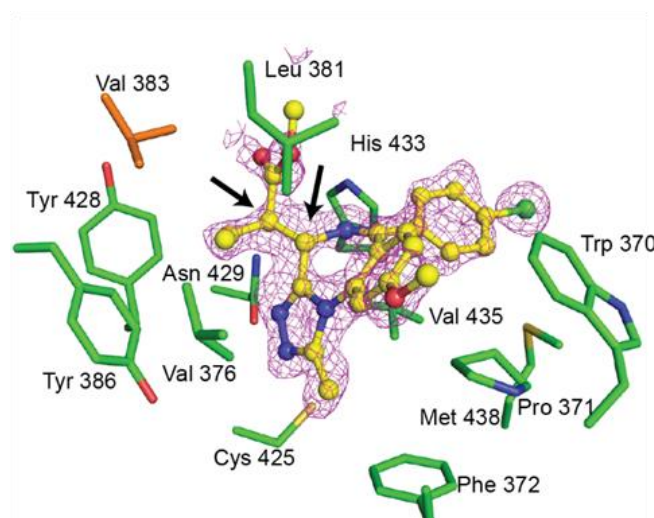

**Figure S10 – 2R,3S is the Potent Enantiomer that Binds to BET Bromodomains**

X-ray structure of BRD2 BD2 (L/V) (green, with mutant valine in orange) co-crystallised with (2R,3S)-8 (yellow). Fo-Fc ligand omit map (magenta mesh surface, contour: 2 sigma) shows clearly defined electron density around chiral centres of (2R,3S)-8 (marked with arrows).

| BRD4<br>BD1        | <b>7</b> |      | <b>(2R,3S)-7</b> |      | <b>(2S,3R)-7</b> |      | <b>8</b> |      | <b>(2R,3S)-8</b> |      | <b>(2S,3R)-8</b> |      |
|--------------------|----------|------|------------------|------|------------------|------|----------|------|------------------|------|------------------|------|
|                    | WT       | L/V  | WT               | L/V  | WT               | L/V  | WT       | L/V  | WT               | L/V  | WT               | L/V  |
| pIC <sub>50</sub>  | 4.9      | 6.2  | 5.1              | 6.8  | 4.2              | 5.6  | 4.3      | 5.7  | 4.1              | 5.9  | 4.6              | 5.0  |
| SE                 | 0.07     | 0.04 | 0.03             | 0.07 | 0.07             | 0.05 | 0.08     | 0.06 | 0.11             | 0.06 | 0.18             | 0.12 |
| ΔpIC <sub>50</sub> | 1.4      |      | 1.7              |      | 1.4              |      | 1.4      |      | 1.8              |      | 0.4              |      |

**Table S7 – AlphaLISA Testing of Separated Enantiomers**

Results of titrations of 7 and 8 enantiomers and racemic mixtures against WT and L/V BRD4 BD1 in competitive AlphaLISA assay. Values refer to total compound concentration.

| BRD4 BD1      | <b>(2R,3S)-7</b> |            | <b>(2S,3R)-7</b> |         | <b>7</b>   |
|---------------|------------------|------------|------------------|---------|------------|
|               | WT               | L/V        | WT               | L/V     | L/V        |
| Kd (nM)       | 58000 ±4000      | 170 ±20    | >60 000          | >60 000 | 500 ±50    |
| ΔH (kcal/mol) | -13.3 ±0.5       | -7.9 ±0.1  |                  |         | -4.2 ±0.0  |
| N             | 1 (FIX)          | 1.06 ±0.01 |                  |         | 1.68 ±0.01 |
|               |                  |            |                  |         |            |
| BRD4 BD1      | <b>(2R,3S)-8</b> |            | <b>(2S,3R)-8</b> |         | <b>8</b>   |
|               | WT               | L/V        | WT               | L/V     | L/V        |
| Kd (nM)       | >60 000          | 440 ±50    | >60 000          | >60 000 | 840 ±170   |
| ΔH (kcal/mol) |                  | -6.5 ±0.1  |                  |         | -3.5 ±0.1  |
| N             |                  | 0.85 ±0.01 |                  |         | 1.42 ±0.02 |

**Table S8 – ITC Testing of Separated Enantiomers**

7 and 8 enantiomers and racemic mixtures titrated against WT and L/V BRD4 BD1 in ITC. Values refer to total compound concentration. For some weak interactions N was fixed to 1.0.

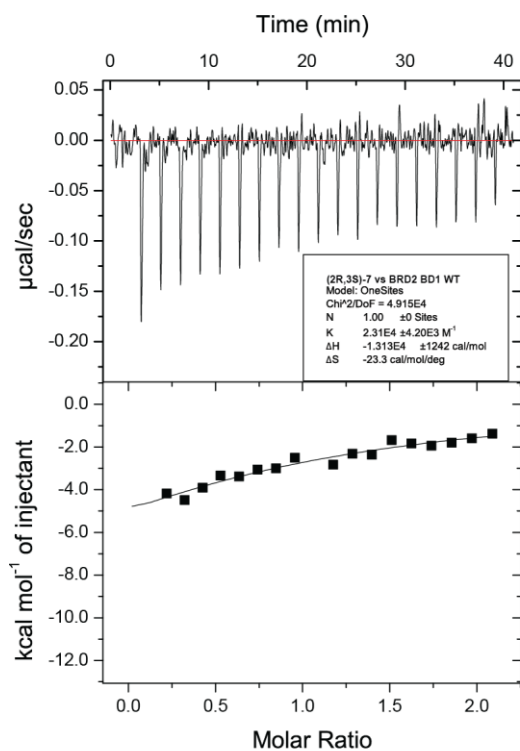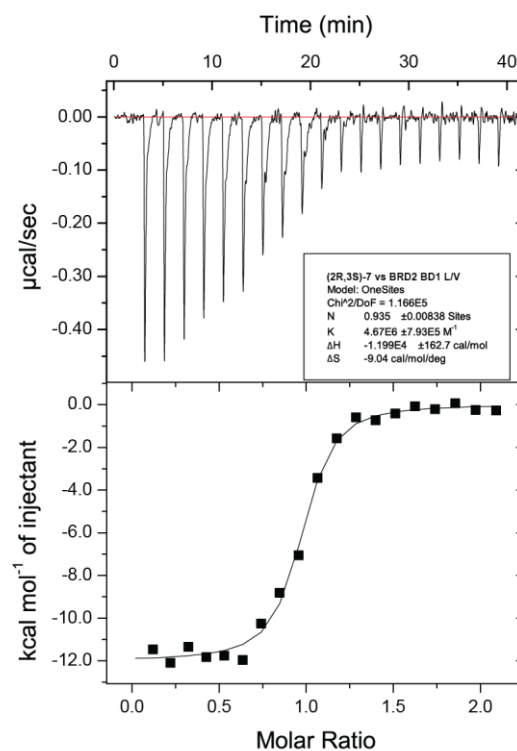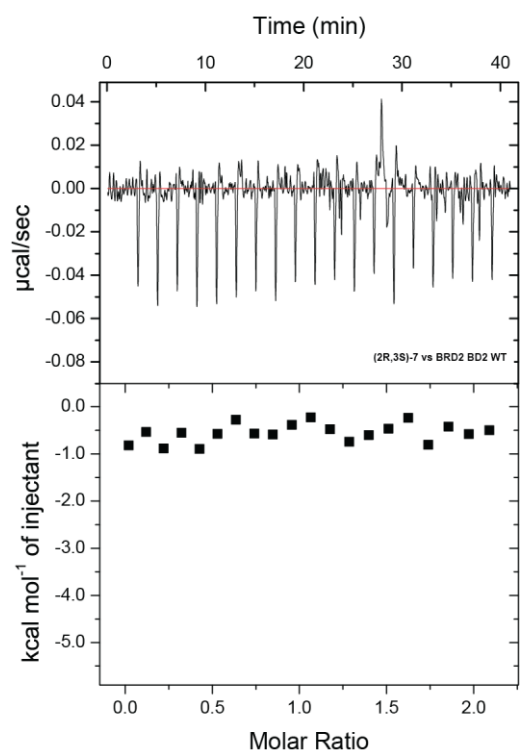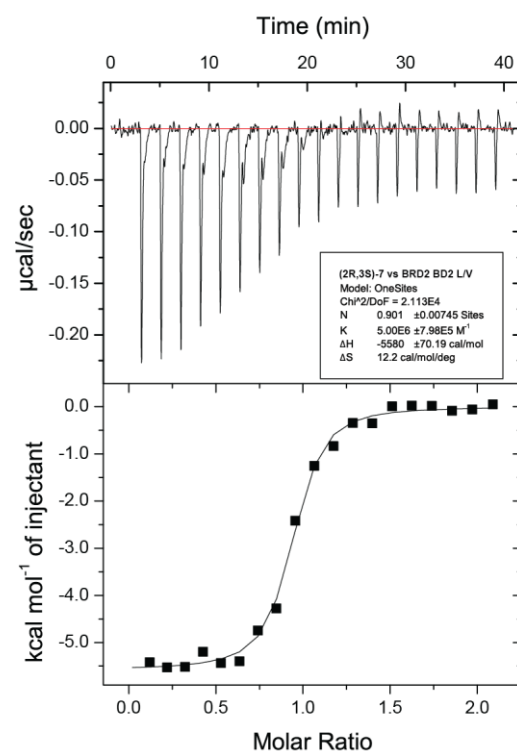

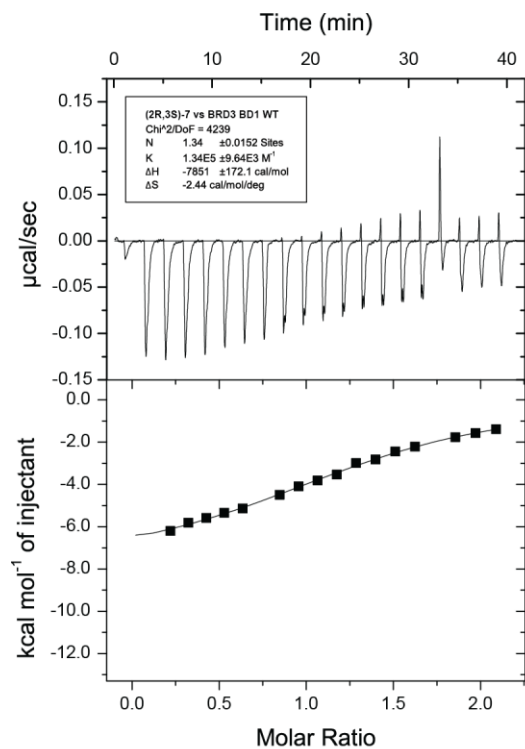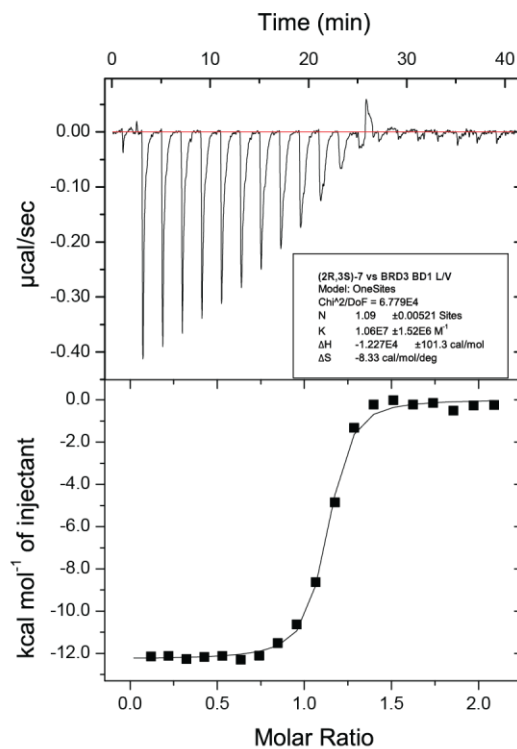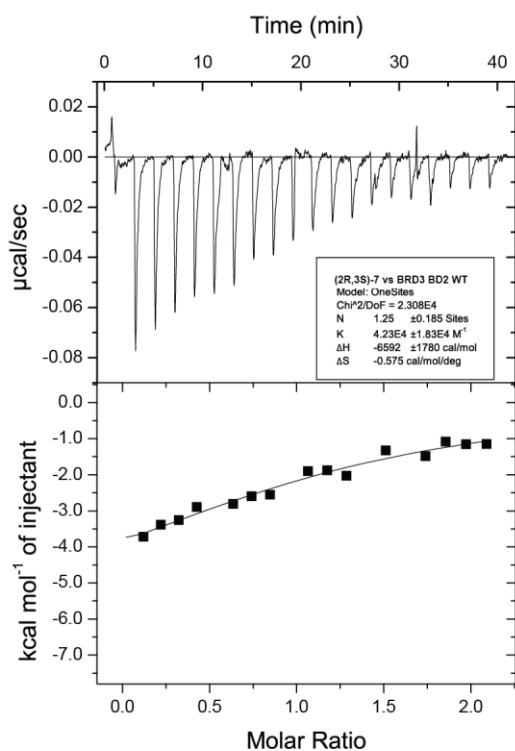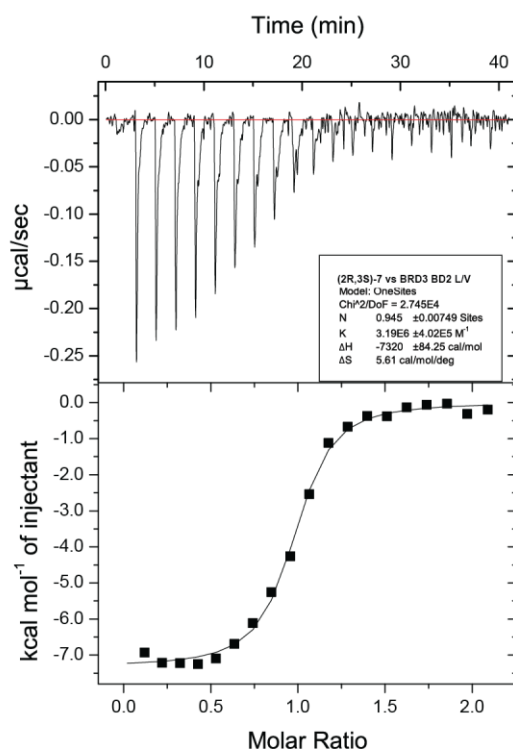



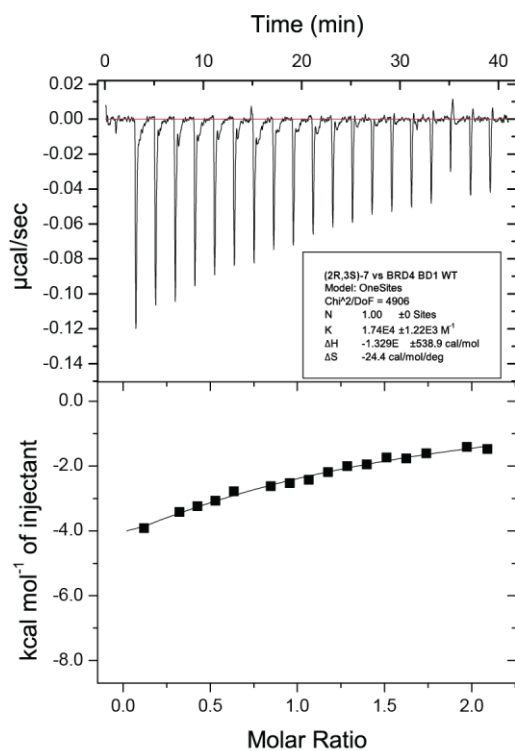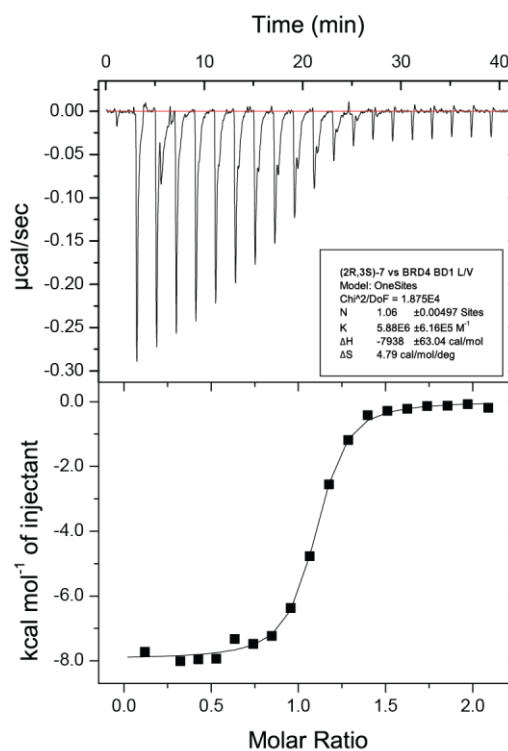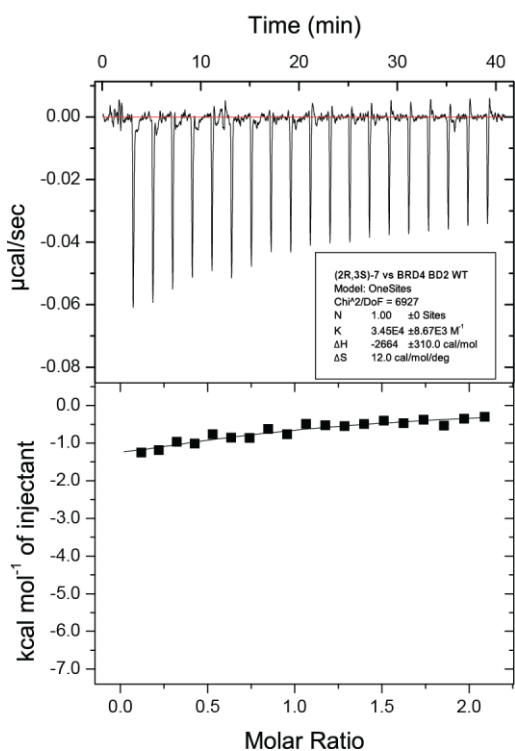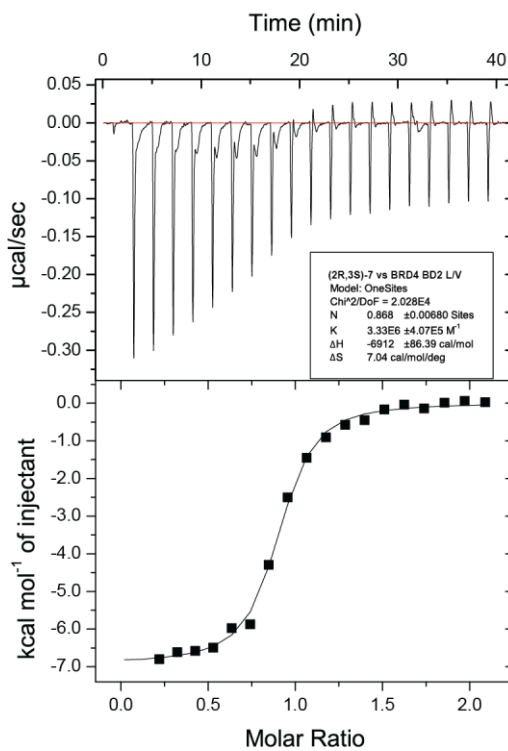

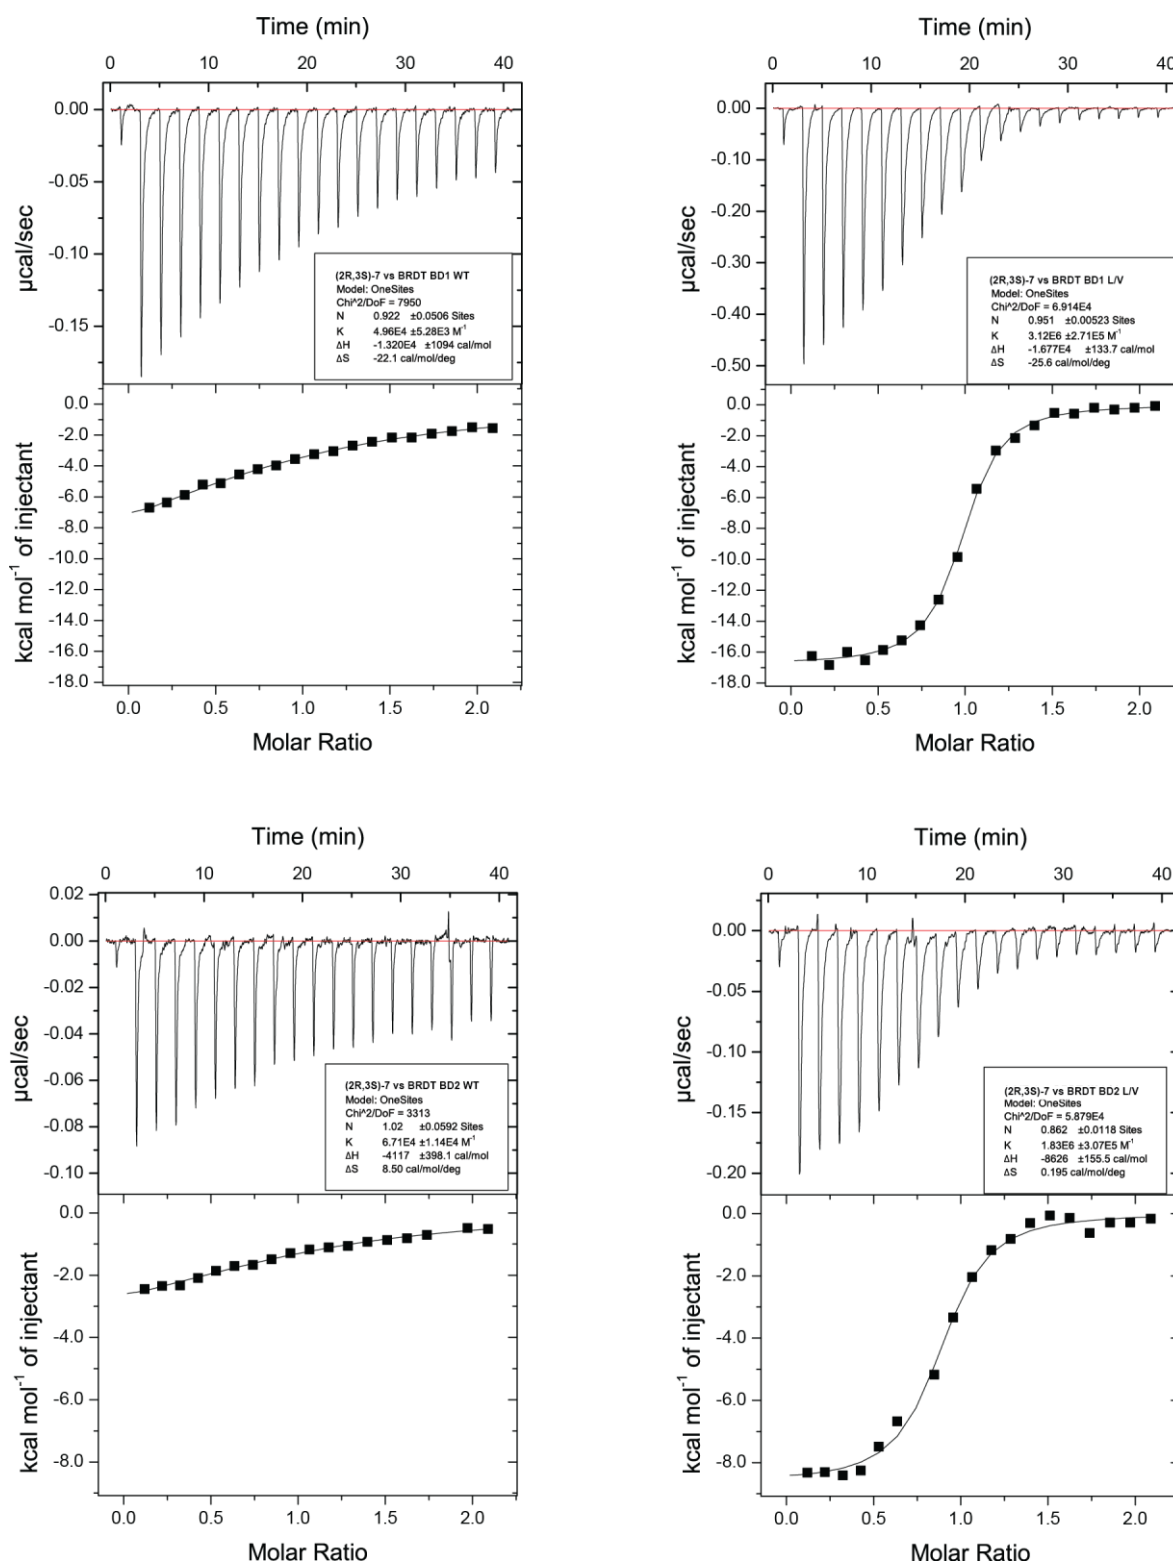

**Figure S11. 9-ME-1 ITC Profile**

Titration of 9-ME-1 (7a) into WT and L/V BET bromodomains. For some weak interactions N value fixed to 1.0.

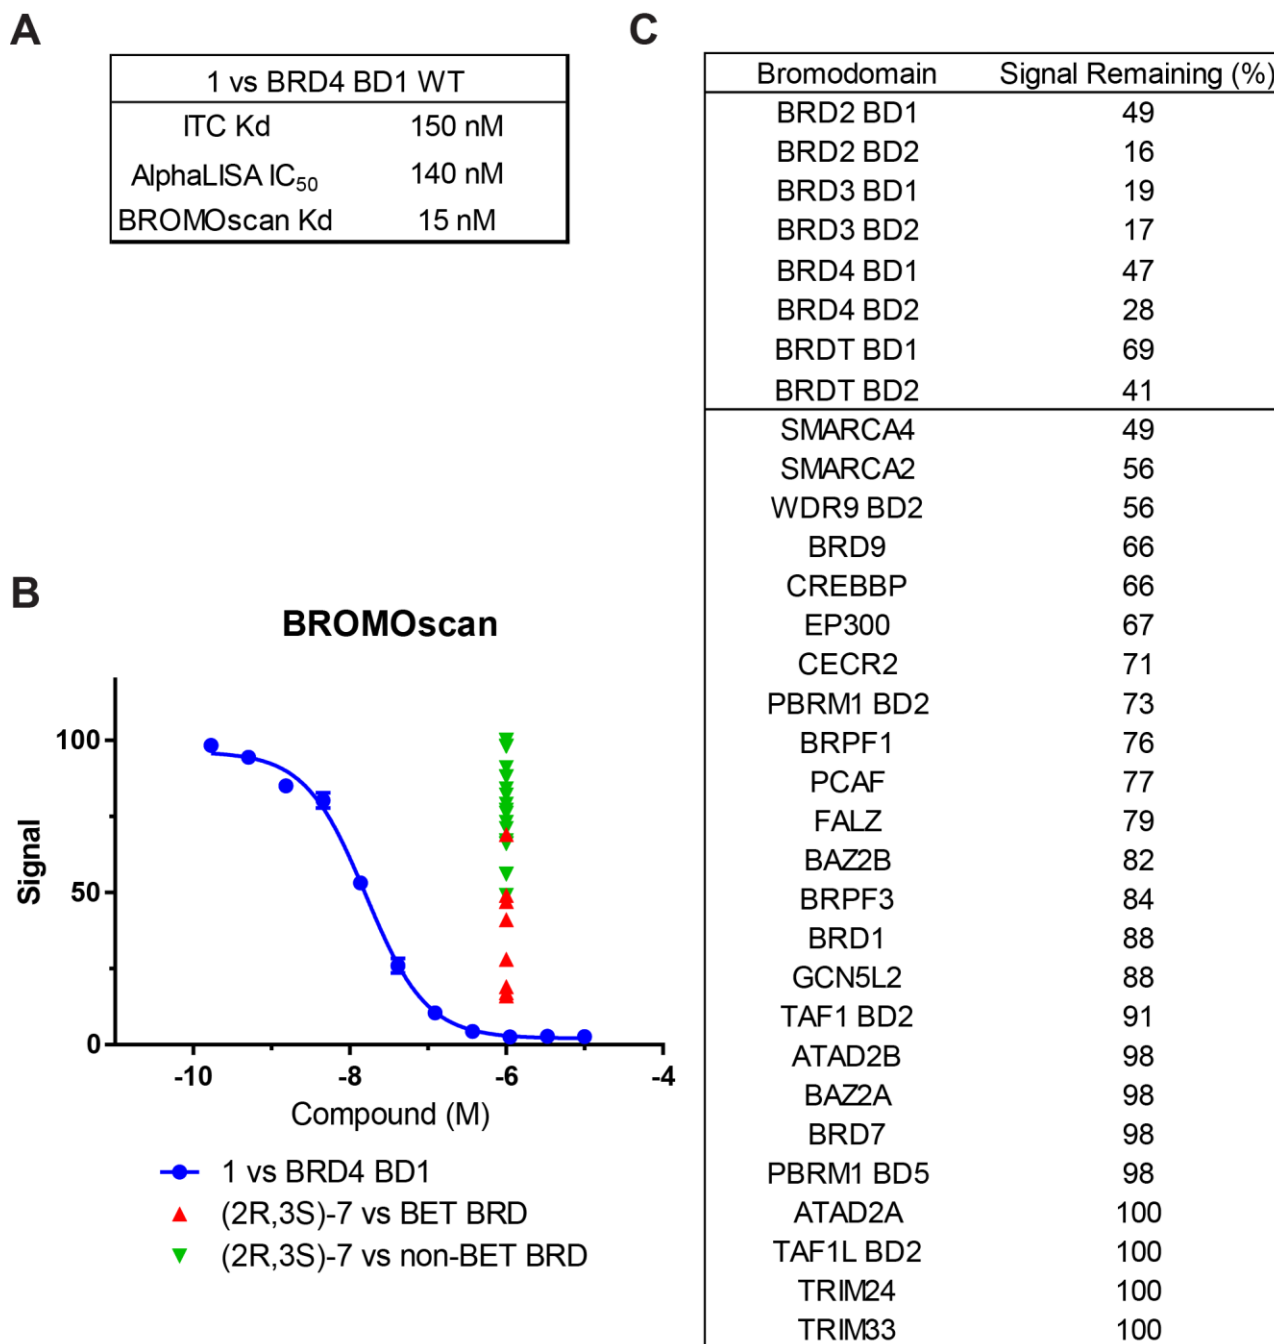

**Figure S12. BROMOscan Screen.**

A) Binding constants for **1** binding to BRD4 BD1 WT. B) BROMOscan titration of **1** against BRD4 BD1 WT, overlaid with results of C. C) BROMOscan signal generated by panel of human bromodomains following treatment with 1  $\mu$ m (**2R, 3S**)-**7**. **1** tested through bromoKdELECT (DiscoverX) and (**2R, 3S**)-**7** tested in bromoMAX (DiscoverX).

<https://www.discoverx.com/services/drug-discovery-development-services/epigenetic-profiling/bromoscan>

| Kinase     | Remaining activity |      |
|------------|--------------------|------|
|            | (%)                | S.D. |
| MST2       | 118                | 14   |
| IRAK4      | 114                | 10   |
| HER4       | 114                | 9    |
| SmMLCK     | 112                | 1    |
| NEK6       | 109                | 12   |
| TAK1       | 108                | 1    |
| CHK2       | 107                | 8    |
| PIM1       | 106                | 10   |
| PAK4       | 104                | 11   |
| AMPK (hum) | 104                | 3    |
| SGK1       | 103                | 5    |
| RIPK2      | 103                | 20   |
| TTK        | 102                | 6    |
| p38a MAPK  | 101                | 6    |
| CAMKKb     | 101                | 1    |
| PRK2       | 100                | 1    |
| MLK3       | 100                | 4    |
| HIPK2      | 99                 | 1    |
| RSK1       | 99                 | 2    |
| TrkA       | 98                 | 0    |
| SYK        | 98                 | 13   |
| TBK1       | 98                 | 2    |
| EF2K       | 97                 | 6    |
| CK2        | 97                 | 0    |
| PDK1       | 97                 | 5    |
| PKCa       | 96                 | 5    |
| BTK        | 96                 | 4    |
| JAK3       | 95                 | 7    |
| GSK3b      | 95                 | 10   |
| PKBa       | 95                 | 9    |
| MSK1       | 94                 | 1    |
| CAMK1      | 94                 | 5    |
| MARK3      | 94                 | 1    |
| Aurora B   | 94                 | 16   |
| IGF-1R     | 93                 | 2    |
| CK1δ       | 93                 | 11   |
| S6K1       | 93                 | 4    |
| PKA        | 92                 | 12   |
| LKB1       | 91                 | 9    |
| JNK1       | 89                 | 16   |
| VEG-FR     | 89                 | 13   |
| MKK1       | 89                 | 2    |
| PLK1       | 89                 | 3    |
| ROCK 2     | 88                 | 3    |
| EPH-A2     | 86                 | 15   |
| Lck        | 86                 | 4    |
| Src        | 82                 | 4    |
| DYRK1A     | 80                 | 8    |
| SRPK1      | 79                 | 6    |
| PKD1       | 78                 | 4    |

**Table S9. 9-ME-1 Kinase Screen**

Activity of panel of human kinases following treatment with 1  $\mu$ M (**2R**, **3S**)-**7**. Dundee MRC-PPU Express Screen (<http://www.kinase-screen.mrc.ac.uk/services/express-screen>)

| Receptor                         | Reference Compound      | Mean % of control specific binding (±SD) |
|----------------------------------|-------------------------|------------------------------------------|
| Y1 (h)                           | NPY                     | 122 (16)                                 |
| mu (MOP) (h)                     | DAMGO                   | 119 (3)                                  |
| H2 (h)                           | cimetidine              | 117 (28)                                 |
| D1 (h)                           | SCH 23390               | 116 (6)                                  |
| 5-HT6 (h)                        | serotonin               | 112 (4)                                  |
| Y2 (h)                           | NPY                     | 110 (13)                                 |
| GABA (non-selective)             | GABA                    | 110 (1)                                  |
| 5-HT2B (h)                       | (±)DOI                  | 109 (0)                                  |
| 5-HT5a (h)                       | serotonin               | 109 (6)                                  |
| sst (non-selective)              | somatostatin-14         | 108 (6)                                  |
| Ca2+ channel (L, verapamil site) | D 600                   | 108 (6)                                  |
| H1 (h)                           | pyrilamine              | 108 (3)                                  |
| NTS1 (NT1) (h)                   | neurotensin             | 106 (3)                                  |
| 5-HT7 (h)                        | serotonin               | 106 (6)                                  |
| beta 2 (h)                       | ICI 118551              | 105 (4)                                  |
| Na+ channel (site 2)             | veratridine             | 105 (6)                                  |
| BZD (central)                    | diazepam                | 105 (10)                                 |
| M2 (h)                           | methocramine            | 105 (0)                                  |
| M1 (h)                           | pirenzepine             | 104 (13)                                 |
| 5-HT1A (h)                       | 8-OH-DPAT               | 104 (1)                                  |
| SKCa channel                     | apamin                  | 103 (10)                                 |
| CCR1 (h)                         | MIP-1alpha              | 102 (4)                                  |
| V1a (h)                          | [d(CH2)51,Tyr(Me)2]-AVP | 102 (3)                                  |
| NK2 (h)                          | [Nleu10]-NKA (4-10)     | 101 (4)                                  |
| M3 (h)                           | 4-DAMP                  | 101 (2)                                  |
| A1 (h)                           | DPCPX                   | 100 (0)                                  |
| delta (DOP) (h)                  | DPDPE                   | 100 (4)                                  |
| 5-HT2A (h)                       | ketanserin              | 100 (3)                                  |
| KV channel                       | alpha -dendrotoxin      | 100 (0)                                  |
| NK3 (h)                          | SB 222200               | 99 (7)                                   |
| A2A (h)                          | NECA                    | 99 (5)                                   |
| AT1 (h)                          | saralasin               | 99 (0)                                   |
| alpha 1 (non-selective)          | prazosin                | 99 (12)                                  |
| B2 (h)                           | NPC 567                 | 98 (1)                                   |
| 5-HT1B                           | serotonin               | 98 (9)                                   |
| Cl- channel (GABA-gated)         | picrotoxinin            | 98 (4)                                   |
| VPAC1 (VIP1) (h)                 | VIP                     | 98 (13)                                  |
| alpha 2 (non-selective)          | yohimbine               | 98 (0)                                   |
| CXCR2 (IL-8B) (h)                | IL-8                    | 96 (10)                                  |
| 5-HT3 (h)                        | MDL 72222               | 96 (1)                                   |
| kappa (KOP)                      | U 50488                 | 96 (9)                                   |
| GAL2 (h)                         | galanin                 | 96 (1)                                   |
| 5-HT transporter (h)             | imipramine              | 96 (2)                                   |
| D2S (h)                          | (+)-butaclamol          | 95 (3)                                   |
| beta 1 (h)                       | atenolol                | 95 (8)                                   |
| NOP (ORL1) (h)                   | nociceptin              | 94 (4)                                   |
| EP4 (h)                          | PGE2                    | 93 (2)                                   |
| A3 (h)                           | IB-MECA                 | 91 (7)                                   |
| CB1 (h)                          | CP 55940                | 90 (4)                                   |
| CCK1 (CCKA) (h)                  | CCK-8s                  | 90 (15)                                  |
| MC4 (h)                          | NDP-alpha -MSH          | 89 (15)                                  |
| norepinephrine transporter (h)   | protriptyline           | 88 (4)                                   |
| ETA (h)                          | endothelin-1            | 87 (3)                                   |
| dopamine transporter (h)         | BTCP                    | 84 (1)                                   |
| MT1 (ML1A) (h)                   | melatonin               | 23 (2)                                   |

**Table S10. Receptor & Ion-Channel Screening**

Activity of panel of receptors and ion channels following treatment with 1  $\mu$ M (**2R**, **3S**)-**7**. CEREP ExpresSProfile panel [http://www.cerep.fr/cerep/utilisateurs/pages/downloads/Documents/Marketing/Pharmacology%20&%20ADME/Standard%20profiles/ExpresSProfile\\_2014v2LD.pdf](http://www.cerep.fr/cerep/utilisateurs/pages/downloads/Documents/Marketing/Pharmacology%20&%20ADME/Standard%20profiles/ExpresSProfile_2014v2LD.pdf)



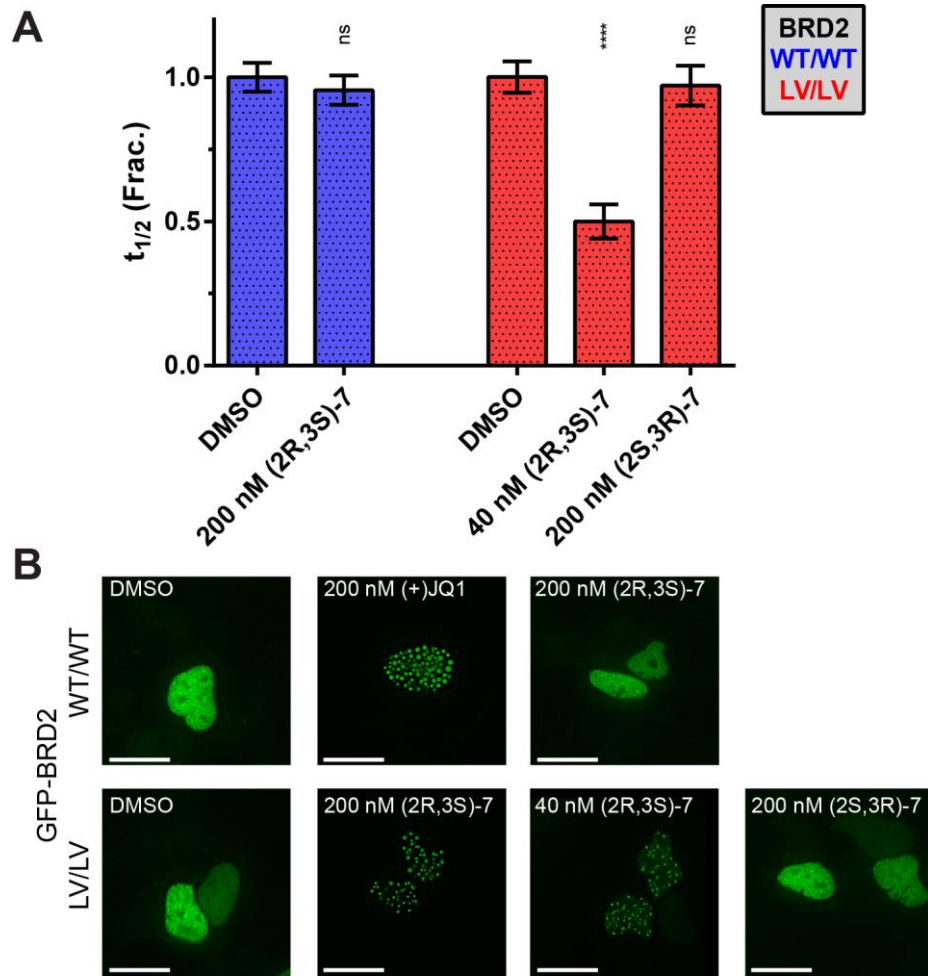

**Figure S13 – GFP-BRD2 Aggregates upon Inhibition**

A) Recovery times of GFP-labelled BRD2 constructs in FRAP assay, following 0.5s laser bleach event, at 2  $\mu$ M SAHA and 0.03% DMSO. Each bar is mean and SE of ~30 U2OS cells. BRD2 LV/LV + 40 nM **(2R, 3S)-7** showed some aggregation but recovery time could still be determined. Statistical significance determined with two-tailed  $t$  tests: ns  $P > 0.05$ ; \*  $P \leq 0.05$ , \*\*  $P \leq 0.01$ , \*\*\*  $P \leq 0.001$ , \*\*\*\*  $P < 0.0001$ .

B) Nuclei of transfected U2OS cells, treated with 2  $\mu$ M SAHA, 0.03% DMSO and test compound. Scale bar = 20  $\mu$ m.

### X-Ray Crystallography: Data Collection & Refinement Statistics

| Structure                          | Apo                            | 3                          | 4                              | 5                             | 7                              | 8                              |
|------------------------------------|--------------------------------|----------------------------|--------------------------------|-------------------------------|--------------------------------|--------------------------------|
| PDB code                           | 5O38                           | 5O39                       | 5O3A                           | 5O3B                          | 5O3C                           | 5O3D                           |
| Data Collection                    |                                |                            |                                |                               |                                |                                |
| Space group                        | P 21 21 2                      | P 21 21 2                  | I 41 2 2                       | I 222                         | P 2 21 21                      | P 21 21 2                      |
| Cell dimensions                    |                                |                            |                                |                               |                                |                                |
| <i>a</i> , <i>b</i> , <i>c</i> (Å) | 52.420,<br>71.409,<br>31.969   | 52.406<br>72.129<br>31.990 | 126.799,<br>126.799,<br>43.194 | 88.075<br>101.893<br>123.534  | 31.852<br>52.082<br>71.789     | 52.407 71.83<br>32.003         |
| $\alpha$ , $\beta$ , $\gamma$ (°)  | 90, 90, 90                     | 90, 90, 90                 | 90, 90, 90                     | 90, 90, 90                    | 90, 90, 90                     | 90, 90, 90                     |
| Resolution (Å)                     | 19.50 - 1.20<br>(1.243 - 1.20) | 21.77-1.74<br>(1.802-1.74) | 40.10 - 2.40<br>(2.486 - 2.40) | 44.04 - 1.95<br>(2.02 - 1.95) | 31.85 - 1.60<br>(1.657 - 1.60) | 32.00 - 1.60<br>(1.657 - 1.60) |
| <i>R</i> <sub>merge</sub>          | 0.05918<br>(0.06509)           | 0.04883<br>(0.05565)       | 0.09961<br>(0.3312)            | 0.2827<br>(0.9697)            | 0.1111<br>(0.5627)             | 0.05236<br>(0.07519)           |
| <i>I</i> /sigma( <i>I</i> )        | 17.14 (14.31)                  | 43.16 (37.50)              | 17.11 (5.14)                   | 10.53 (2.26)                  | 7.67 (2.04)                    | 32.70 (18.62)                  |
| <i>CC</i> <sub>1/2</sub>           | 0.997 (0.998)                  | 1 (0.999)                  | 0.999 (0.984)                  | 0.984 (0.535)                 | 0.992 (0.755)                  | 0.999 (0.994)                  |
| Completeness (%)                   | 98.26 (93.37)                  | 97.12 (79.28)              | 99.18<br>(100.00)              | 99.92 (99.98)                 | 99.51 (99.56)                  | 98.83 (94.76)                  |
| Redundancy                         | 5.7 (5.7)                      | 17.1 (15.3)                | 15.3 (14.6)                    | 8.6 (7.8)                     | 4.3 (4.2)                      | 10.3 (7.2)                     |
| Refinement                         |                                |                            |                                |                               |                                |                                |
| Resolution (Å)                     | 19.50 - 1.20<br>(1.243 - 1.20) | 21.77-1.74<br>(1.802-1.74) | 40.10 - 2.40<br>(2.486 - 2.40) | 44.04 - 1.95<br>(2.02 - 1.95) | 31.85 - 1.60<br>(1.657 - 1.60) | 32.00 - 1.60<br>(1.657 - 1.60) |
| No. reflections                    | 122513<br>(5072)               | 123746<br>(4452)           | 109065<br>(10146)              | 349867<br>(31395)             | 69717 (6561)                   | 168336<br>(11018)              |
| Unique no. of reflections          | 37657 (894)                    | 12633 (291)                | 7114 (696)                     | 40791 (4007)                  | 16285 (1575)                   | 16364 (1536)                   |
| <i>R</i> <sub>work</sub>           | 0.1178<br>(0.1068)             | 0.1443<br>(0.1466)         | 0.2055<br>(0.3278)             | 0.1972<br>(0.2710)            | 0.1615<br>(0.2197)             | 0.1473<br>(0.1294)             |
| <i>R</i> <sub>free</sub>           | 0.1413<br>(0.1365)             | 0.1897<br>(0.2237)         | 0.2547<br>(0.3512)             | 0.2442<br>(0.3180)            | 0.1945<br>(0.2670)             | 0.1702<br>(0.1561)             |
| No. atoms                          |                                |                            |                                |                               |                                |                                |
| Protein                            | 991                            | 922                        | 893                            | 3613                          | 918                            | 948                            |
| Ligand/ion                         | 31                             | 40                         | 31                             | 128                           | 40                             | 41                             |
| Water                              | 237                            | 203                        | 57                             | 559                           | 212                            | 219                            |
| <i>B</i> factors                   |                                |                            |                                |                               |                                |                                |
| Average                            | 13.3                           | 12.9                       | 43.2                           | 19.3                          | 16.7                           | 11.80                          |
| Protein                            | 10.1                           | 10.4                       | 43.3                           | 18.4                          | 14.3                           | 8.50                           |
| Ligand/ion                         | 16.9                           | 11.0                       | 37.9                           | 15.4                          | 15.8                           | 18.10                          |
| Water                              | 26.0                           | 24.9                       | 44.4                           | 25.9                          | 27.6                           | 24.80                          |
| R.m.s. deviations                  |                                |                            |                                |                               |                                |                                |
| Bond lengths (Å)                   | 0.005                          | 0.007                      | 0.011                          | 0.009                         | 0.007                          | 0.009                          |
| Bond angles (°)                    | 1.03                           | 1.05                       | 1.19                           | 1.04                          | 1.08                           | 1.06                           |

| Structure<br>PDB Code<br>Data Collection | 16<br>5O3E                    | 17<br>5O3F                     | 18<br>5O3G                     | 21<br>5O3H                    | 24<br>5O3I                     |
|------------------------------------------|-------------------------------|--------------------------------|--------------------------------|-------------------------------|--------------------------------|
| Space group                              | P 21 21 2                     | P 21 21 2                      | P 21 21 2                      | P 21 21 2                     | P 21 21 2                      |
| Cell dimensions                          |                               |                                |                                |                               |                                |
| <i>a</i> , <i>b</i> , <i>c</i> (Å)       | 52.177, 71.95,<br>31.917      | 51.965 71.548<br>31.704        | 73.74, 52.66,<br>63.12         | 52.143, 71.837,<br>31.97      | 53.12, 72.829,<br>32.359       |
| $\alpha$ , $\beta$ , $\gamma$ (°)        | 90, 90, 90                    | 90, 90, 90                     | 90, 90, 90                     | 90, 90, 90                    | 90, 90, 90                     |
| Resolution (Å)                           | 35.98 - 1.40<br>(1.45 - 1.40) | 42.05 - 1.75<br>(1.813 - 1.75) | 25.41 - 1.85<br>(1.916 - 1.85) | 35.92 - 1.40<br>(1.45 - 1.40) | 14.31 - 1.20<br>(1.243 - 1.20) |
| <i>R</i> <sub>merge</sub>                | 0.1005<br>(0.2228)            | 0.1116<br>(0.1436)             | 0.07581<br>(0.3878)            | 0.06188<br>(0.1025)           | 0.1049<br>(0.5239)             |
| <i>I</i> / $\sigma$ ( <i>I</i> )         | 15.07 (4.57)                  | 7.72 (6.60)                    | 9.64 (3.00)                    | 21.35 (7.92)                  | 9.10 (3.25)                    |
| <i>CC</i> <sub>1/2</sub>                 | 0.998 (0.955)                 | 0.992 (0.99)                   | 0.997 (0.776)                  | 0.999 (0.982)                 | 0.994 (0.781)                  |
| Completeness (%)                         | 99.77 (97.92)                 | 99.66 (99.92)                  | 95.19 (95.67)                  | 98.72 (93.14)                 | 99.19 (99.29)                  |
| Redundancy                               | 9.6 (4.8)                     | 3.9 (4.0)                      | 3.9 (3.9)                      | 7.5 (3.7)                     | 5.8 (5.8)                      |
| <b>Refinement</b>                        |                               |                                |                                |                               |                                |
| Resolution (Å)                           | 35.98 - 1.40<br>(1.45 - 1.40) | 42.05 - 1.75<br>(1.813 - 1.75) | 25.41 - 1.85<br>(1.916 - 1.85) | 35.92 - 1.40<br>(1.45 - 1.40) | 14.31 - 1.20<br>(1.243 - 1.20) |
| No. reflections                          | 232876<br>(11299)             | 27589 (1075)                   | 79692 (7845)                   | 180745 (8305)                 | 229769<br>(22505)              |
| Unique no. of reflections                | 24337 (2352)                  | 12439 (269)                    | 20578 (2034)                   | 24057 (2228)                  | 39710 (3911)                   |
| <i>R</i> <sub>work</sub>                 | 0.1315<br>(0.1401)            | 0.1721<br>(0.2604)             | 0.1888<br>(0.2460)             | 0.1477<br>(0.1678)            | 0.1557<br>(0.2044)             |
| <i>R</i> <sub>free</sub>                 | 0.1653<br>(0.1794)            | 0.2018<br>(0.2902)             | 0.2356<br>(0.2788)             | 0.1636<br>(0.1633)            | 0.1784<br>(0.2326)             |
| No. atoms                                |                               |                                |                                |                               |                                |
| Protein                                  | 931                           | 909                            | 1818                           | 932                           | 939                            |
| Ligand/ion                               | 41                            | 42                             | 66                             | 41                            | 45                             |
| Water                                    | 218                           | 185                            | 196                            | 229                           | 218                            |
| <i>B</i> factors                         |                               |                                |                                |                               |                                |
| Average                                  | 12.7                          | 14.3                           | 26.5                           | 14.3                          | 14.2                           |
| Protein                                  | 9.7                           | 12.2                           | 25.9                           | 11.1                          | 11.2                           |
| Ligand/ion                               | 11.5                          | 14.8                           | 26.3                           | 13.6                          | 18.1                           |
| Water                                    | 26.0                          | 24.7                           | 32.0                           | 27.5                          | 26.2                           |
| R.m.s. deviations                        |                               |                                |                                |                               |                                |
| Bond lengths (Å)                         | 0.006                         | 0.006                          | 0.014                          | 0.011                         | 0.019                          |
| Bond angles (°)                          | 1.68                          | 1.01                           | 1.52                           | 1.15                          | 1.75                           |

## **Materials & Methods**

### **1 – Cloning & Mutagenesis**

Plasmids pNIC28-Bsa4 KanR containing the 8 single BET bromodomain constructs BRD2 BD1 (protein start and stop positions K71-K176), BRD2 BD2 G344-D455, BRD3 BD1 P24-E144, BRD3 BD2 G306- P416, BRD4 BD1 N44-E168, BRD4 BD2 K333-E460, BRDT BD1 N21-E137 and BRDT BD2 S257-M361 were provided by the Oxford Structural Genomics Consortium (SGC) for expression with an N-terminal His6-tag and a TEV protease cleavage site (UniProt accession number, BRD2: P25440; BRD3: Q15059; BRD4: O60885). For tandem construct of BRD2, cDNA encoding both bromodomains and the linker region (G73-D455) was cloned from full-length cDNA clone purchased from DNASU Plasmid Repository at the Arizona State University into a pCri (11b) vector (based on pET15b, AmpR) for expression with an N-terminal His6-tag, a Small Ubiquitin-like Modifier (SUMO) tag, and a SUMO protease (SEN1) cleavage site. Plasmid pcDNA5-FRT/TO-GFP and cDNA clones for full length BRD2, BRD3 and BRD4 were gifts from Dr Mark Peggie from University of Dundee. Full-length cDNA of human BRD2 (M1-G801), BRD3 (M1-E726) and BRD4 (M1-F1362) were cloned into pcDNA5-FRT/TO-GFP to generate constructs for expressing corresponding protein in mammalian cell line. GFP-BRDT (pcDNA6.2/N-EmGFP-DEST)<sup>1</sup> was a gift from Kyle Miller (Addgene plasmid # 65381). NF- $\kappa$ B-RE/luc2P luciferase reporter plasmid consists of one luc2P gene, controlled by 5 copies of an NF- $\kappa$ B response element, cloned from a pGL4.32 vector into a pBABE vector. Luciferase reporter plasmid provided by Dr. Mark Peggie (Division of Signal Transduction Therapy (DSTT), MRC-PPU, University of Dundee).

Single point mutations were introduced using QuickChange II Site directed Mutagenesis Kit (Agilent). Primers were designed following the recommendations from manufacturer. The polymerase chain reaction (PCR) was performed on a 2720 Thermal Cycler (Applied Biosystems®). Upon digestion of the parental DNA strands by DpnI restriction enzyme, the PCR product was transformed into competent *E. coli* DH5 $\alpha$  cells and grown on lysogeny broth (LB) agar plates containing corresponding selection antibiotics at 37°C for 16h. Single colonies were then picked from the agar plates and grown for 12h in 10 mL of LB medium containing selection antibiotics. Extracted and purified plasmid DNA were then sequenced to confirm the presence of the desired mutation.

### **2 – Protein Expression & Purification**

BL21 *E. coli* cells were transformed with bromodomain-expressing pNIC plasmids using heat shock. Cell cultures were grown at 37°C and 200 rpm in LB media with 50  $\mu$ g/ml kanamycin. A starter culture was incubated until saturation, then diluted 100-fold in fresh media and grown until reaching an optical density of 2.0 (OD<sub>600</sub>). The temperature of the culture was decreased to 18°C, and protein expression was induced overnight with 0.4 mM IPTG. Cells were harvested the next day by centrifugation (4000 rpm for 20 minutes at 4°C, JS-4.2 rotor on a Beckman J6-MC centrifuge) and stored as pellets at -20°C.

Cell pellets were resuspended in lysis buffer (50 mM HEPES, 500 mM NaCl, 10 mM imidazole & 2 mM  $\beta$ -mercaptoethanol pH7.5) and treated with one complete protease inhibitor (Roche) tablet. Cells were lysed using a Stanstead pressure cell homogenizer and the lysate centrifuged at 20 000 rpm for 1 hour at 4°C (JA-25.50 rotor in Beckman Avanti J-25 centrifuge) and the supernatant transferred and passed through a 0.45  $\mu$ m filter.

The lysate was purified using metal ion affinity chromatography, with a His Trap 5ml Ni sepharose column (GE Healthcare) on an AKTApure™ system (GE Healthcare). The column was washed with 30 ml of lysis buffer, and the protein was eluted using 30 ml of elution buffer (50 mM HEPES, 500 mM NaCl, 250 mM imidazole and 2 mM  $\beta$ -mercaptoethanol at pH 7.5). The Ni column elution was concentrated to 2 ml using a Vivaspin 20, 10 000 MWCO (Sartorius) before further purification using size exclusion chromatography. Concentrated Ni column elution was passed through a Superdex 75 16/60 Hiload column (GE healthcare) on an AKTApure™ system, using gel filtration buffer (20 mM HEPES, 150 mM NaCl and 1 mM DTT at pH 7.5). Desired fractions were pooled, concentrated and aliquoted before being flash frozen and stored at -80°C.

### **3 – Differential Scanning Fluorimetry (DSF) / Thermal Shift**

DSF experiments were performed on a BioRad CFXconnect machine, using clear 96-well plates. Protein constructs were tested at 6  $\mu$ M, with 2.5X SYPRO orange (Invitrogen), in 40  $\mu$ l of buffer (10 mM HEPES, 100 mM NaCl, pH7.5). Samples underwent a heat cycle from 20°C to 95°C, heated at a rate of 1°C every minute. Plates were

read at 1 minute intervals. Each sample was tested in triplicate. Data was analyzed as recommended by Niesen et al<sup>2</sup>, using GraphPad Prism 6 and the SGC's DSF Analysis 3.02 spreadsheet.

#### 4 – X-ray Crystallography

Purified BRD2 BD2 L/V protein at 8 mg/mL was mixed with excess amount of a bumped compound (2-4 mM) to form a protein-compound complex. Drops of the complex were mixed 2:1 with precipitant solution in sitting-drop vapour diffusion format. Crystallization condition of protein complexes varies with different bumped compounds, the condition ranges from 0.1 M Tris pH 7.5 - 9.0, 45 - 60 % pentaerythritol propoxylate (5/4 PO/OH), with or without 0.2 M imidazole as additive. Crystals appeared within hours and were fully grown after 2-3 d. Diffraction data were either collected at in-house Rigaku M007HF X-ray generator equipped with Varimax Cu-VHF optics using a Saturn 944HG+ CCD detector at a wavelength of 1.5418 Å or Diamond Light Source beamline I04-1 using a Pilatus 6M-F detector at a wavelength of 0.92819 Å at temperature 100K.

Indexing and integration of reflections was either performed using XDS with the XDGUI interface<sup>3</sup> or MOSFLM<sup>4</sup>, and scaling and merging with AIMLESS<sup>5</sup> in CCP4i<sup>6</sup>. To solve the phase problem the molecular replacement method was used with the programs MOLREP<sup>7</sup> and Phaser<sup>8</sup> using search models derived from the coordinates of BRD2 BD2 WT (PDB entry 2DVV). The initial model was refined iteratively using PHENIX<sup>9, 10</sup> and COOT<sup>11</sup>. Ligand structures and restraints were generated using eLBOW<sup>12</sup>, REEL<sup>13</sup> and PRODRG<sup>14</sup>. The MOLPROBITY server<sup>15</sup> was used to validate the geometry and steric clashes in the structures. The structure models have been deposited in the protein data bank (PDB) and data collection and refinement statistics are presented in supplementary information. All figures were generated using PyMOL<sup>16</sup>.

#### 5 – Bio-Layer Interferometry (BLI)

All BLI experiments were carried out on a OctetRed 384 instrument (ForteBio), at 25°C and in 20 mM HEPES, 150 mM NaCl pH7.5 buffer. A histone peptide library, possessing both single and multiple lysine acetylation marks, was obtained from Alta Bioscience Ltd. Peptides were 20 residues long and were biotinylated on the C-terminal (with aminohexanoic linker). Streptavidin-coated BLI tips (ForteBio) were loaded in 100 µl 5 µM peptide (or 10 µg/ml biocytin) over 10 minutes. For the assay bromodomain constructs were kept at 20 µM in 100 µl buffer in black 384-well plates, agitated at 1000rpm. Each assay involved exposing peptide-loaded BLI tips to buffer for 120s to determine baseline signal, 240s in protein to measure association and finally 120s in buffer to measure dissociation. Raw data was then analyzed using the ForteBio software, to account for background signal and non-specific binding.

#### 6 – Isothermal Titration Calorimetry (ITC)

ITC titrations were performed on an ITC<sub>200</sub> instrument (MicroCal™, GE Healthcare). Proteins, peptides and compounds were all dissolved in ITC buffer (20 mM HEPES, 100 mM NaCl, pH7.5), with protein samples buffer-exchanged through dialysis using D-tubes (Millipore). Each ITC titrations consisted of 20 titrations: 1 initial injection of 0.4 µl over 0.8s, followed by 19 injections of 2 µl over 4s, at 2 minute intervals. Data was analyzed using the Microcal LLC ITC200 Origin data analysis software, using a single binding site model, to determine binding values such as  $K_d$  and enthalpy of binding.

Peptide titrations were carried out at 15°C, with 2 mM of acetylated histone peptide titrated against 50-150 µM bromodomain. Ligand titrations were performed at 30°C, with 250 µM active ligand titrated against 25 µM bromodomains, with a final DMSO concentration of 2.5%. Tandem constructs were carried out at 30°C and with 1.5% DMSO, with 150 µM compound titrated into 15 µM protein.

#### 7 – AlphaLISA

In all competitive AlphaLISA assays ligand was titrated against 100 nM His-tagged bromodomain and 5 nM biotinylated JQ1 (bio-JQ1), in AlphaLISA buffer: 50 mM HEPES, 100 mM NaCl, 0.1% BSA, 0.02% CHAPS, pH7.5 (final concentration). Ligands were tested over an 11-point 3-fold serial dilution, starting at 100 µM, and giving a final DMSO concentration of 1%. Binding was detected using anti-His6 antibody-conjugated AlphaLISA acceptor beads and streptavidin-coated AlphaScreen donor beads (PerkinElmer), with a final concentration of 10 µg/ml for each



bead). Titrations were prepared in light-grey 384-well Alphasplates (PerkinElmer), and read on a Pherastar FS plate reader (BMG) equipped with an AlphaLISA excitation/emission module. Data was analyzed and dose-response curves generated using GraphPad Prism 6.

Each assay well had a final volume of 25  $\mu$ l. First 5  $\mu$ l of 5X ligand was mixed with 10  $\mu$ l of a 2.5X mix of bromodomains and Bio-JQ1 (prepared en-masse, aliquoted, flash-frozen and stored at -80°C) and incubated for 1 hour at room temperature. The assay plate was then moved to a dark room and 5  $\mu$ l of 5X acceptor beads were added and incubated for 1 hour. Then (still in darkness) 5  $\mu$ l of 5X donor beads were added, the plate was incubated for 1 more hour before being read. The direct titrations of Bio-JQ1 against bromodomains follows the same procedure, but in the first step of the assay 5  $\mu$ l 5X Bio-JQ1 was mixed with 10  $\mu$ l 5X bromodomain. Bio-JQ1 followed an 11-step 3-fold serial dilution, starting at 10  $\mu$ M (final concentration).

## 8 – DMPK

### Plasma Half-life:

50  $\mu$ M test compound incubated in mouse BALB/c plasma (pre-warmed to 37°C and buffered to pH7.4 in ratio of 70:30 plasma:buffer). At 0, 30, 60, 120 and 180 minutes a 50  $\mu$ l aliquot of incubation mixture were removed and mixed with 200  $\mu$ l acetonitrile, containing 50 ng/ml Donepezil as the internal standard, to stop the reaction. The samples were centrifuged to sediment any precipitated protein and the microplates sealed prior to UPLC-MS/MS analysis using a Quattro Premier XE (Waters Corporation). XLfit (IDBS) was used to calculate the exponential decay and hence the rate constant (K) using the ratio of the peak areas of the test compound to the internal standard at each time point. The half-life was calculated for each test compound using the formula:  $t_{1/2} = 0.693/K$ .

### Intrinsic Clearance:

0.5  $\mu$ M test compound was incubated with BAB/c female CD1 mouse liver microsomes (Xenotech LLC TM; 0.5 mg/ml 50 mM potassium phosphate buffer, pH7.4) and the reaction started with addition of excess NADPH (8 mg/ml 50 mM potassium phosphate buffer, pH7.4). At 0, 3, 6, 9, 15 and 30 minutes a 50  $\mu$ l aliquot of the incubation mixture was removed and mixed with 100  $\mu$ l acetonitrile to stop the reaction. Internal standard was added to all samples, which were centrifuged to sediment precipitated protein and the microplates were then sealed prior to UPLC MS/MS analysis using a Quattro Premier XE. XLfit was used to calculate the exponential decay and hence the rate constant (K), based on the ratio of the peak areas of test compound to internal standard at each time point. The rate of intrinsic clearance (CLi) was then calculated using the following formula:

$$CL_i \text{ (ml/min/g liver)} = K \times V \times \text{microsomal protein yield}$$

Where V (ml/mg protein) is the incubation volume/mg protein added, and microsomal protein yield is taken as 52.5 mg protein/g liver. 0.5  $\mu$ M Verapamil used as a positive control to confirm assay performance.

### PAMPA:

PAMPA was performed using a 96-well pre-coated BD Gentest™ PAMPA plate (BD Biosciences). Each well was divided into two chambers; donor and acceptor, separated by a lipid-oil-lipid tri-layer constructed in a porous filter. The effective permeability,  $P_e$ , of the compound was measured at pH 7.4. Stock solutions (5 mM) of the compound were prepared in DMSO. The compound was then further diluted to 10  $\mu$ M in phosphate buffered saline at pH 7.4. The final DMSO concentration did not exceed 5% v/v. The compound dissolved in phosphate buffered saline was then added to the donor side of the membrane and phosphate buffered saline without compound was added to the acceptor side. The PAMPA plate was left at room temperature for 5 h. After which time, an aliquot (100  $\mu$ l) was then removed from both acceptor and donor compartments and mixed with acetonitrile (80  $\mu$ l) containing an internal standard. The samples were centrifuged (10 min, 5°C, 3270 g) to sediment precipitated protein and sealed prior to UPLC-MS/MS analysis using a Quattro Premier XE.  $P_e$  was calculated as shown in the below equation:

$$P_e \text{ (nm/sec)} = 10^7 \times -\ln [1 - C_A(t) / C_{\text{equi}}] / (A \times [1/V_D + 1/V_A] \times t)$$

Where:

$C_A(t)$  = peak area of compound present in acceptor well at time  $t = 18000$  sec

$C_{\text{equi}}$  =  $[C_D(t) \times V_D + C_A(t) \times V_A] / (V_D + V_A)$

A = filter area

VD = donor well volume

VA = acceptor well volume

t = incubation time

$C_D(t)$  = peak area of compound present in donor well at time  $t = 18000$  sec

Recovery of compound from donor and acceptor wells was calculated and data was only accepted when recovery exceeded 70 %.

## 9 – Tissue Culture

Human U2OS, HEK293T and HL-60 cell lines were obtained from ATCC and MV4;11 cell line was obtained from DSMZ. U2OS and HEK293T were kept in DMEM medium (Gibco) supplemented with 10% FBS (Gibco), 1% L-glutamate (Gibco) and 100 U/ml penicillin and streptomycin. Cells were kept in an incubator at 37°C, 5% CO<sub>2</sub>. MV4-11 and HL-60 were kept in RPMI medium (Gibco) supplemented with 10% FBS, 1% L-glutamate (Gibco) and 100 U/ml penicillin and streptomycin. All cell lines were tested for mycoplasma contamination every month using MycoAlert Mycoplasma detection kit (Lonza).

## 10 – Fluorescence Recovery after Photobleaching (FRAP)

FRAP experiments were performed in human osteosarcoma U2OS cells transfected with pcDNA5 FRT/TO plasmids encoding wild-type and mutant GFP chimeras of BET proteins. Cells were seeded into glass-bottom, 35x10mm dishes (WillCo) at ~200 000 cells in 2 ml media per dish ~66 hours before FRAP. Cells were transfected using FuGENE HD (Promega) and 1 µg of plasmid DNA ~42 hours before FRAP. 18 hours before FRAP cells were treated with test compounds and SAHA (Sigma-Aldrich) to a final concentration of 1 µM and 2 µM, respectively, giving a final DMSO concentration of 0.03%.

FRAP experiments were carried out on a Deltavision Elite imaging system (GE Healthcare) running Resolve 3D (SoftWoRx) kept at 37°C and using a FITC filter set (488 nm excitation, 525 nm emission). Cells were imaged using a 60X objective lens (Olympus), with an exposure time of 0.05s and using 2x2 binning to give a 512x512 pixel image. Cells were excluded for FRAP experiments if they displayed aberrant morphology and signs of cell-death. Cells providing a signal of <1000 fluorescence units were excluded as they were too close to the background signal for photobleaching (requiring reduction to ~50% fluorescence) to be observed. Cells fluorescing over 3500 units were also excluded due to the risk of detector saturation.

Cells were photobleached using a quantifiable laser module (QLM), set to a wavelength of 488 nm and 100% power, for 0.5s, covering an area with a 0.5 µm<sup>2</sup> radius. For each cell 5 images were captured pre-bleach (over 5 seconds) and 32 post-bleach, using a CoolSNAP HQ camera (Photometrics). Post-bleach imaging was usually spread over 60s and distributed to best measure a  $t_{1/2}$  of ~2s, although this was altered in some cases. FRAP experiments were analyzed in SoftWorx (GE Healthcare) using the PK analysis function, set to analyze a bleach event with 0.5 µm<sup>2</sup> radius. Calculated  $t_{1/2}$  values were extracted and analyzed in Prism 6 (GraphPad). Each experiment was run twice on separate days, with ~20 cells tested on each day.

## 11 – WT Cell Cytotoxicity

Compound cytotoxicity was measured using the CellTiter-Glo assay (Promega). Compounds were serially diluted in a sterile, white, clear-bottom 384-well cell culture microplate (Greiner Bio-one), at 2X concentration and a volume of 25 µl. 25 µl of 2X cell suspension was then added. Both cells and compounds were diluted in RPMI medium. After 48hr incubation 25 µl of CellTiter-Glo reagent was added to each cells. Following 15 minute incubation the luminescence signal was read on a Pherastar FS. The final concentration of assay components are as follows: 3x10<sup>5</sup> cells/ml, 0.05% DMSO, 5 µM and below compound. Compounds were tested in triplicate, against the BET-dependent AML cell-lines MV4-11 and HL60.

## 12 – NF-κB Luciferase Assay

Luciferase experiments were performed in human HEK293T cells seeded in a 24-well plate at 100 000 cells in 500 µl media, and transfected with pcDNA5 FRT/TO plasmids encoding WT and mutant GFP-BRD4 chimeras, and pBABE NF-κB-RE//*luc2P* reporter plasmid. Cells were transfected using Lipofectamine™ LTX (Invitrogen) with PLUS™ reagent, with each well receiving 0.5 µg of each plasmid, 2.5 µl LTX and 0.5 µl PLUS reagent. The next day cells were treated with compounds, giving a final concentration of 1 µM compound and 0.01% DMSO. 6 hours later cells were washed with PBS, lysed with passive lysis buffer (Promega) and stored at -20°C.

Luciferase activity was measured using the Promega luciferase assay. In a black 384-well plate 3µl of clarified lysate was mixed with 15µl luciferase assay reagent and after 15 minutes luminescence was measured in a Pherastar FS. Differences in cell numbers were controlled for by measuring the protein content of each lysate using the Pierce™ Coomassie (Bradford) assay. Each experiment was run twice, on separate days, with each experiment containing 3 technical replicates.

## Chemical Synthesis

### General information:

NMR spectra were recorded on a Bruker 500 Ultrashield or a Bruker Ascend 400. Chemical shifts are quoted in ppm and referenced to the residual solvent signals:  $^1\text{H}$   $\delta$  = 7.26 ( $\text{CDCl}_3$ ),  $^{13}\text{C}$   $\delta$  = 77.16 ( $\text{CDCl}_3$ ). High Resolution Mass Spectra (HRMS) were recorded on a Bruker micrOTOF. All chemicals, unless otherwise stated are commercially available and used without further purification. Micro wave reactions were performed in Biotage Initiator. Flash column chromatography was performed using a Teledyne Isco Combiflash Rf or Rf200i. Prepacked columns RediSep Rf Normal Phase Disposable Columns were used. Preparative HPLC was performed on a Waters mass directed HPLC with a Waters X-Bridge C18 column (100 mm x 19 mm; 5 µm particle size). Separation of the diastereomers was achieved with a gradient of 5 % to 95 % acetonitrile in water with 0.1 % formic acid in the aqueous phase.

Compounds **1**,<sup>2</sup> I-Bet762,<sup>2</sup> and **2**<sup>3</sup> were prepared according to literature procedures. **3**,<sup>4</sup> and **4**<sup>4</sup> were prepared according to previous work in our group.

### General procedure for the alkylation in $\alpha$ -position:

Compound **1** (200 mg, 487 µmol, 1 eq.) or **2** (200 mg, 487 µmol, 1 eq.) was dissolved in anhydrous tetrahydrofuran (5 ml in the case of **1** and 10 ml in the case of **2**). This solution was then added drop wise to a solution of potassium hexamethyldisilazane (1.17 ml of a 0.5 M solution in toluene, 584 µmol, 1.2 eq.) in tetrahydrofuran (5 ml) at -80 °C under an atmosphere of nitrogen. After 1 h at this temperature the corresponding alkyl iodide (584 µmol, 1.2 eq.) was added drop wise. The reaction mixture was warmed to 25 °C over 18 h and a few drops of acetic acid were then added to quench the reaction. The solvent was removed and the residue purified by flash column chromatography using a linear gradient from 10 % to 60 % acetone in heptane. For isomerization, the alkylated compound, together with freshly prepared sodium methoxide (10 eq.), was dissolved in methanol (2 ml) and heated to 120 °C for 40 min in a microwave reactor. The reaction mixture was acidified with aqueous hydrochloric acid (1 M), diluted with water and extracted three times with dichloromethane. The combined organic phases were dried over magnesium sulphate and evaporated to dryness. Separation of the diastereoisomers was achieved as described above.

(+)-methyl (R)-2-((S)-6-(4-chlorophenyl)-8-methoxy-1-methyl-4H-benzo[f][1,2,4]triazolo[4,3-a][1,4]diazepin-4-yl)pent-4-enoate (**5**).

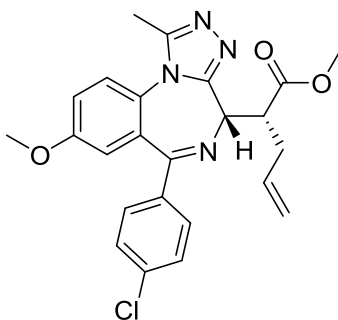

Yield: 32.3 mg (15 %);  $^1\text{H-NMR}$  ( $\text{CDCl}_3$ , 500 MHz)  $\delta$  2.40-2.46 (m, 1 H), 2.60 (s, 3 H), 2.88-2.93 (m, 1 H), 3.80 (s, 3 H), 3.81 (s, 3 H), 4.12-4.16 (m, 1 H), 4.27 (d, 1 H,  $J(\text{H,H}) = 11.0$  Hz), 4.99-5.06 (m, 2 H), 5.82-5.90 (m, 1 H), 6.87 (d, 1 H,  $J(\text{H,H}) = 2.90$  Hz), 7.21 (dd, 1 H,  $J(\text{H,H}) = 2.90$  Hz,  $J(\text{H,H}) = 8.90$  Hz), 7.30-7.33 (m, 2 H), 7.39-7.43 (m, 3 H);  $^{13}\text{C-NMR}$  ( $\text{CDCl}_3$ , 126 MHz)  $\delta$  12.1, 34.2, 47.8, 51.5, 55.8, 58.4, 115.8, 117.2, 117.9, 124.8, 126.4, 128.5, 129.9, 130.7, 134.4, 137.0, 150.4, 154.9, 158.0, 165.5, 174.7; HRMS  $m/z$  calc. for  $\text{C}_{24}\text{H}_{24}\text{ClN}_4\text{O}_3$   $[\text{M}+\text{H}^+]$  451.1531, found 451.1523.

**(+/-)methyl (R)-2-((S)-6-(4-chlorophenyl)-8-methoxy-1-methyl-4H-benzo[f][1,2,4]triazolo[4,3-a][1,4]diazepin-4-yl)pentanoate (6).**

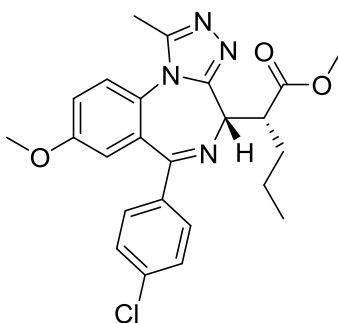

Yield: 28.6 mg (12 %);  $^1\text{H-NMR}$  (400 MHz,  $\text{CDCl}_3$ )  $\delta$  0.92 (t,  $J(\text{H,H}) = 7.3$  Hz, 3H), 1.35 (m, 1H), 1.53 (m, 2H), 2.06 (m, 1H), 2.59 (s, 3H), 3.80 (s, 3H), 3.83 (s, 3H), 4.05 (m, 1H), 4.22 (d,  $J(\text{H,H}) = 11.1$  Hz, 1H), 6.86 (d,  $J(\text{H,H}) = 2.9$  Hz, 1H), 7.21 (dd,  $J(\text{H,H}) = 8.9$ , 2.9 Hz, 1H), 7.31 (m, 2H), 7.40 (m, 3H);  $^{13}\text{C-NMR}$  (100 MHz,  $\text{CDCl}_3$ )  $\delta$  12.1, 14.0, 20.6, 32.1, 48.1, 51.6, 55.8, 59.1, 115.7, 117.9, 124.8, 126.4, 128.5, 129.9, 130.7, 136.9 (2C), 150.4, 155.1, 158.0, 165.5, 175.7; HRMS  $m/z$  calc. for  $\text{C}_{24}\text{H}_{26}\text{ClN}_4\text{O}_3$   $[\text{M}+\text{H}]^+$  453.1693, found: 453.1678.

**(+/-) methyl (R)-2-((S)-6-(4-chlorophenyl)-9-methoxy-1-methyl-4H-benzo[f][1,2,4]triazolo[4,3-a][1,4]diazepin-4-yl)propanoate (7).**

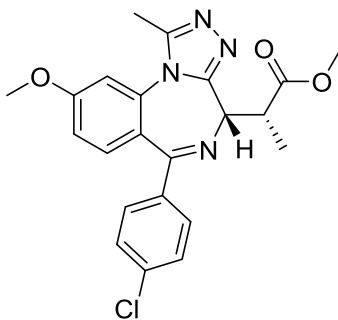

Yield: 35.9 mg (17 %);  $^1\text{H-NMR}$  ( $\text{CDCl}_3$ , 400 MHz)  $\delta$  1.49 (d, 3 H,  $J(\text{H,H}) = 6.64$  Hz), 2.64 (s, 3 H), 3.82 (s, 3 H), 3.95 (s, 3 H), 4.05-4.11 (m, 1 H), 4.23 (d, 1 H,  $J(\text{H,H}) = 11.04$  Hz), 6.94 (s, 1 H), 6.98 (d, 1 H,  $J(\text{H,H}) = 8.96$  Hz), 7.31 (d, 2 H,  $J(\text{H,H}) = 7.40$  Hz), 7.35-7.39 (m, 3 H);  $^{13}\text{C-NMR}$  ( $\text{CDCl}_3$ , 101 MHz)  $\delta$  12.3, 15.3, 42.4, 51.8, 55.9, 59.6, 109.4, 112.7, 121.4, 128.4, 130.8, 133.4, 134.7, 136.7, 137.4, 150.2, 154.9, 161.6, 165.7, 176.1; HRMS  $m/z$  calc. for  $\text{C}_{22}\text{H}_{22}\text{ClN}_4\text{O}_3$   $[\text{M}+\text{H}^+]$  425.1375, found 425.1381.

**(+/-) Methyl (S\*)-2-((S\*)-6-(4-chlorophenyl)-9-methoxy-1-methyl-4H-benzo[f][1,2,4]triazolo[4,3-a][1,4]diazepin-4-yl)propanoate (S\*, S\*) 7**

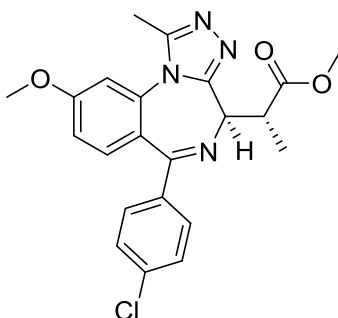

$^1\text{H}$  NMR (400 MHz,  $\text{CDCl}_3$ )  $\delta$ : 1.60 (d,  $J=7.1$  Hz, 3H), 2.63 (s, 3H), 3.72 (s, 3H), 3.86- 3.92 (m, 3H), 3.94 (s, 3H), 4.27 (d,  $J=10.3$  Hz, 1H), 6.93 (d,  $J=2.4$  Hz, 1H), 6.98 (dd,  $J=2.6, 8.8$  Hz, 1H), 7.32-7.38 (m, 3H), 7.49 (d,  $J=8.1$  Hz, 2H).  $^{13}\text{C}$ -NMR (100 MHz,  $\text{CDCl}_3$ )  $\delta$ : 12.4, 15.5, 41.1, 52.0, 55.9, 57.8, 76.7, 77.0, 77.3, 109.3, 112.9, 121.4, 128.5, 130.8, 133.1, 135.1, 136.8, 137.7, 150.0, 156.1, 161.6, 166.5, 176.1; HRMS  $m/z$  calc. for  $\text{C}_{22}\text{H}_{22}\text{ClN}_4\text{O}_3$   $[\text{M}+\text{H}^+]$  425.1375, found 425.1388.

**(+)-methyl (R)-2-((S)-6-(4-chlorophenyl)-9-methoxy-1-methyl-4H-benzo[f][1,2,4]triazolo[4,3-a][1,4]diazepin-4-yl)butanoate (8).**

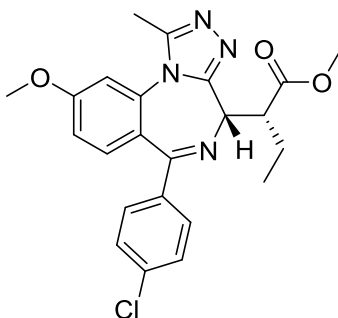

Yield: 25.6 mg (12 %);  $^1\text{H}$ -NMR ( $\text{CDCl}_3$ , 400 MHz)  $\delta$  1.01 (t, 3 H,  $J(\text{H,H})=7.28$  Hz), 1.57-1.68 (m, 1 H), 2.12-2.21 (m, 1 H), 2.63 (s, 3 H), 3.84 (s, 3 H) 3.95 (s, 3 H), 4.00 (dd, 1 H,  $J(\text{H,H})=2.80$  Hz,  $J(\text{H,H})=11.2$  Hz), 4.23 (d, 1 H,  $J(\text{H,H})=10.9$  Hz), 6.94 (s, 1 H) 6.98 (d, 1 H,  $J(\text{H,H})=8.48$  Hz), 7.30 (d, 2 H,  $J(\text{H,H})=7.68$  Hz), 7.34-7.38 (m, 3 H);  $^{13}\text{C}$ -NMR ( $\text{CDCl}_3$ , 101 MHz)  $\delta$  11.6, 12.4, 23.2, 49.7, 51.6, 55.9, 58.8, 109.4, 112.7, 121.4, 128.4, 130.8, 133.4, 134.7, 136.7, 137.4, 150.2, 155.1, 161.6, 165.8, 175.5; HRMS  $m/z$  calc. for  $\text{C}_{23}\text{H}_{24}\text{ClN}_4\text{O}_3$   $[\text{M}+\text{H}^+]$  439.1531, found 439.1513.

**(+)-methyl (R)-2-((S)-6-(4-chlorophenyl)-9-methoxy-1-methyl-4H-benzo[f][1,2,4]triazolo[4,3-a][1,4]diazepin-4-yl)pent-4-enoate (9).**

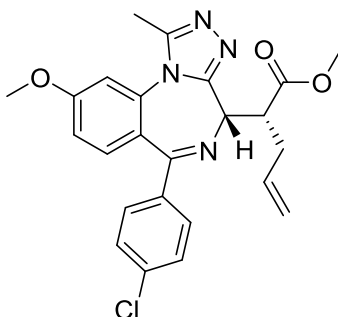

Yield: 27.3 mg (12 %);  $^1\text{H}$ -NMR ( $\text{CDCl}_3$ , 400 MHz)  $\delta$  2.38-2.46 (m, 1 H), 2.64 (s, 3 H), 2.88-2.94 (m, 1 H), 3.80 (s, 3 H), 3.95 (s, 3 H), 4.11-4.17 (m, 1 H), 4.27 (d, 1 H,  $J(\text{H,H})=10.9$  Hz), 4.99-5.07 (m, 2 H), 5.82-5.92 (m, 1 H), 6.93 (d, 1 H,  $J(\text{H,H})=2.44$  Hz), 6.98 (dd, 1 H,  $J(\text{H,H})=2.48$  Hz,  $J(\text{H,H})=8.80$  Hz), 7.29-7.32 (m, 2 H), 7.34-7.39 (m, 3 H);  $^{13}\text{C}$ -NMR ( $\text{CDCl}_3$ , 101 MHz)  $\delta$  12.4, 34.2, 47.9, 51.6, 55.9, 58.3, 109.4, 112.7, 117.2, 121.3, 128.4, 130.8, 133.4, 134.5, 134.7, 136.8, 137.3, 150.3, 154.8, 161.6, 165.9, 174.7; HRMS  $m/z$  calc. for  $\text{C}_{24}\text{H}_{24}\text{ClN}_4\text{O}_3$   $[\text{M}+\text{H}^+]$  451.1531, found 451.1540.

### General procedure for Amide formation:

The mixture of diastereomers of the ester compounds (100  $\mu$ mol, 1 eq.) were hydrolyzed in methanol (0.5 ml) and aqueous sodium hydroxide (0.5 ml, 1 M in water) by heating to 100 °C for 30 min in a microwave oven. After quenching with aqueous hydrochloric acid (1 M) the reaction mixture was extracted three times with dichloromethane. The combined organic phases were dried over magnesium sulfate and evaporated to dryness. To this end, the obtained free carboxylic acid was dissolved in dichloromethane, the corresponding amine (150  $\mu$ mol, 1.5 eq.), HATU (57.0 mg, 150  $\mu$ mol, 1.5 eq.) and *N,N*-diisopropylethylamine (69.9  $\mu$ l, 400  $\mu$ mol, 4 eq.) were added and the reaction mixture stirred at 25 °C for 2 h. The solvent was removed and the residue subject to flash column chromatography before the diastereomers were separated as described above.

### (+)-(R)-2-((S)-6-(4-chlorophenyl)-8-methoxy-1-methyl-4H-benzo[f][1,2,4]triazolo[4,3-a][1,4]diazepin-4-yl)-N-ethylpropanamide (16).

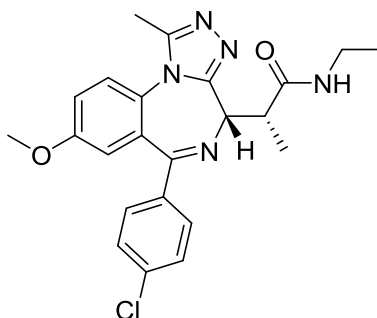

Yield: 13.2 mg (30 %);  $^1\text{H-NMR}$  ( $\text{CDCl}_3$ , 500 MHz)  $\delta$  1.25 (t, 3 H,  $J(\text{H,H}) = 7.25$  Hz), 1.44 (d, 3 H,  $J(\text{H,H}) = 6.75$  Hz), 2.59 (s, 3 H), 3.33-3.50 (m, 2 H), 3.63-3.69 (m, 1 H), 3.79 (s, 3 H), 4.24 (d, 1 H,  $J(\text{H,H}) = 9.80$  Hz), 6.25 (t, 1 H,  $J(\text{H,H}) = 5.49$  Hz), 6.85 (d, 1 H,  $J(\text{H,H}) = 2.90$  Hz), 7.20 (dd, 1 H,  $J(\text{H,H}) = 2.90$  Hz,  $J(\text{H,H}) = 8.90$  Hz), 7.29-7.32 (m, 2 H), 7.39 (d, 1 H,  $J(\text{H,H}) = 8.85$  Hz), 7.43-7.46 (m, 2 H);  $^{13}\text{C-NMR}$  ( $\text{CDCl}_3$ , 126 MHz)  $\delta$  12.1, 15.0, 15.6, 34.4, 43.6, 55.8, 59.7, 115.6, 118.1, 124.8, 126.4, 128.4, 130.0, 136.9, 137.1, 150.3, 155.6, 158.0, 165.5, 174.4; HRMS  $m/z$  calc. for  $\text{C}_{23}\text{H}_{25}\text{ClN}_5\text{O}_2$  [ $\text{M}+\text{H}^+$ ] 438.1691, found 438.1675.

### (+)-(R)-2-((S)-6-(4-chlorophenyl)-8-methoxy-1-methyl-4H-benzo[f][1,2,4]triazolo[4,3-a][1,4]diazepin-4-yl)-N-ethylbutanamide (17).

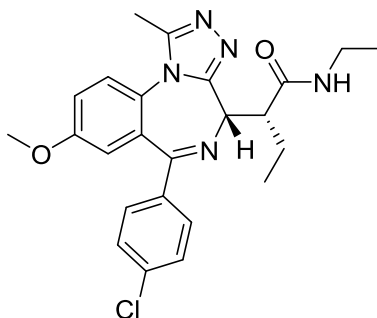

Yield: 11.7 mg (26 %);  $^1\text{H-NMR}$  ( $\text{CDCl}_3$ , 500 MHz)  $\delta$  1.03 (t, 3 H,  $J(\text{H,H}) = 7.35$  Hz), 1.27 (t, 3 H,  $J(\text{H,H}) = 7.25$  Hz), 1.64-1.74 (m, 1 H), 2.01-2.09 (m, 1 H), 2.59 (s, 3 H), 3.42-3.49 (m, 3 H), 3.79 (s, 3 H), 4.23 (d, 1 H,  $J(\text{H,H}) = 10.0$  Hz), 6.17 (s, 1 H), 6.85 (d, 1 H,  $J(\text{H,H}) = 2.85$  Hz), 7.20 (dd, 1 H,  $J(\text{H,H}) = 2.90$  Hz,  $J(\text{H,H}) = 10.4$  Hz), 7.30-7.21 (m, 2 H), 7.38 (d, 1 H,  $J(\text{H,H}) = 8.90$  Hz), 7.42-7.45 (m, 2 H);  $^{13}\text{C-NMR}$  ( $\text{CDCl}_3$ , 126 MHz)  $\delta$  11.9, 12.1, 15.2, 22.9, 34.4, 51.3, 55.8, 59.0, 115.6, 118.1, 124.8, 126.5, 128.4, 130.0, 130.8, 136.9, 137.1, 150.3, 155.7, 158.0, 165.4, 173.5; HRMS  $m/z$  calc. for  $\text{C}_{24}\text{H}_{26}\text{ClN}_5\text{O}_2$  [ $\text{M}+\text{H}^+$ ] 452.1848, found 452.1839.

### (+)-(R)-2-((S)-6-(4-chlorophenyl)-8-methoxy-1-methyl-4H-benzo[f][1,2,4]triazolo[4,3-a][1,4]diazepin-4-yl)-N-ethylpent-4-enamide (18).

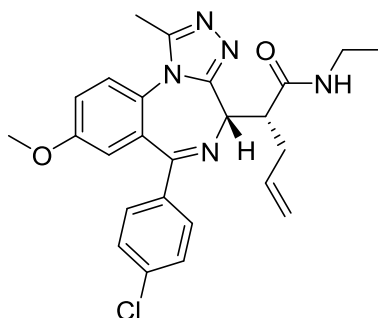

Yield: 14.7 mg (32 %);  $^1\text{H-NMR}$  ( $\text{CDCl}_3$ , 400 MHz)  $\delta$  1.19 (t, 3 H,  $J(\text{H,H}) = 7.20$  Hz), 2.48-2.56 (m, 1 H), 2.62 (s, 3 H), 2.70-2.76 (m, 1 H), 3.32-3.44 (m, 2 H), 3.52-3.58 (m, 1 H), 3.80 (s, 3 H), 4.32 (d, 1 H,  $J(\text{H,H}) = 8.48$  Hz), 5.02 (d, 1 H,  $J(\text{H,H}) = 10.3$  Hz), 5.10 (d, 1 H,  $J(\text{H,H}) = 17.0$  Hz), 5.82-5.92 (m, 1 H), 6.60 (s, 1 H), 6.86 (d, 1 H,  $J(\text{H,H}) = 2.84$  Hz), 7.23 (dd, 1 H,  $J(\text{H,H}) = 2.84$  Hz,  $J(\text{H,H}) = 8.96$  Hz), 7.33-7.35 (m, 2 H), 7.44-7.48 (m, 3 H);  $^{13}\text{C-NMR}$  ( $\text{CDCl}_3$ , 101 MHz)  $\delta$  11.8, 14.9, 34.4, 48.5, 55.9, 57.7, 116.1, 117.5, 118.1, 125.2, 125.6, 128.5, 129.9, 130.9, 134.8, 136.8, 137.2, 150.8, 155.3, 158.4, 166.4, 172.9; HRMS  $m/z$  calc. for  $\text{C}_{25}\text{H}_{27}\text{ClN}_5\text{O}_2$  [ $\text{M}+\text{H}^+$ ] 464.1848, found 464.1840.

**(+)- (R)-2-((S)-6-(4-chlorophenyl)-8-methoxy-1-methyl-4H-benzo[f][1,2,4]triazolo[4,3-a][1,4]diazepin-4-yl)-N,N-diethylpropanamide (19)**

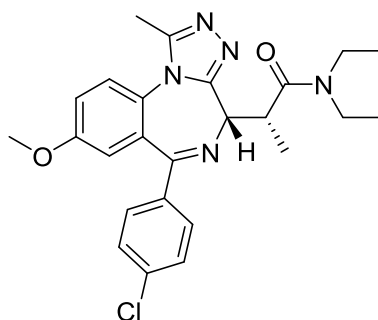

Yield: 17.3 mg (37 %);  $^1\text{H-NMR}$  ( $\text{CDCl}_3$ , 400 MHz)  $\delta$  1.24 (t, 3 H,  $J(\text{H,H}) = 7.24$  Hz), 1.33 (t, 3 H,  $J(\text{H,H}) = 6.92$  Hz), 1.41 (d, 3 H,  $J(\text{H,H}) = 6.64$  Hz), 2.65 (s, 3 H), 3.37-3.45 (m, 1 H), 3.50-3.74 (m, 3 H), 3.80 (s, 3 H), 4.21-4.29 (m, 1 H), 4.40 (d, 1 H,  $J(\text{H,H}) = 10.6$  Hz), 6.88 (s, 1 H), 7.21-7.29 (m, 1 H), 7.30 (d, 2 H), 7.41-7.46 (m, 3 H);  $^{13}\text{C-NMR}$  ( $\text{CDCl}_3$ , 101 MHz)  $\delta$  11.8, 13.4, 15.0, 15.6, 38.0, 40.7, 42.5, 55.9, 60.4, 115.7, 118.1, 125.0, 125.8, 128.3, 130.0, 130.8, 136.9, 137.0, 150.7, 155.8, 158.3, 165.1, 174.3; HRMS  $m/z$  calc. for  $\text{C}_{25}\text{H}_{29}\text{ClN}_5\text{O}_2$  [ $\text{M}+\text{H}^+$ ] 466.2004, found 466.1997.

**(+)- (R)-2-((S)-6-(4-chlorophenyl)-8-methoxy-1-methyl-4H-benzo[f][1,2,4]triazolo[4,3-a][1,4]diazepin-4-yl)-N,N-diethylbutanamide (20)**

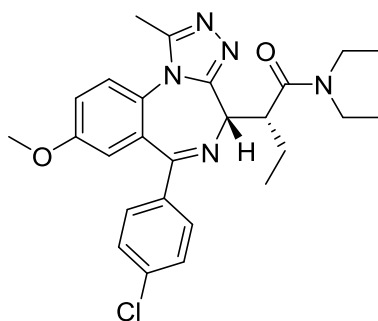

Yield: 15.8 mg (33 %);  $^1\text{H-NMR}$  ( $\text{CDCl}_3$ , 400 MHz)  $\delta$  1.00 (t, 3 H,  $J(\text{H,H}) = 7.28$  Hz), 1.26 (t, 3 H,  $J(\text{H,H}) = 7.00$  Hz), 1.33 (t, 3 H,  $J(\text{H,H}) = 6.84$  Hz), 1.65-1.74 (m, 1 H), 2.04-2.11 (m, 1 H), 2.62 (s, 3 H), 3.50-3.76 (m, 4 H), 3.80 (s, 3 H), 4.11-4.23 (m, 1 H), 4.31 (d, 1 H,  $J(\text{H,H}) = 10.5$  Hz), 6.86 (s, 1 H), 7.19-7.22 (m, 1 H), 7.29 (d, 2 H,  $J(\text{H,H}) = 7.64$  Hz), 7.40-7.43 (m, 3 H);  $^{13}\text{C-NMR}$  ( $\text{CDCl}_3$ , 101 MHz)  $\delta$  11.6, 11.9, 13.4, 14.8, 40.8, 42.5, 44.4, 55.9, 59.9, 115.7, 118.1, 124.9, 126.0, 128.3, 129.9, 130.8, 136.8, 137.1, 150.6, 155.9, 158.2, 165.2, 173.5; HRMS  $m/z$  calc. for  $\text{C}_{26}\text{H}_{31}\text{ClN}_5\text{O}_2$  [ $\text{M}+\text{H}^+$ ] 480.2161, found 480.2171.



**(+)-(R)-2-((S)-6-(4-chlorophenyl)-9-methoxy-1-methyl-4H-benzo[f][1,2,4]triazolo[4,3-a][1,4]diazepin-4-yl)-N-ethylpropanamide (21).**

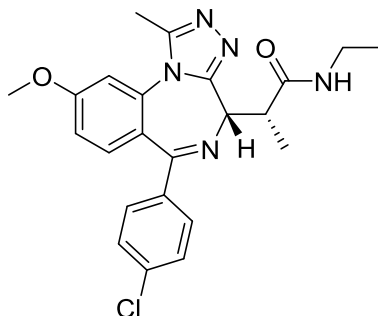

Yield: 12.6 mg (29 %);  $^1\text{H-NMR}$  ( $\text{CDCl}_3$ , 400 MHz)  $\delta$  1.24 (t, 3 H,  $J(\text{H,H}) = 7.20$  Hz), 1.44 (d, 3 H,  $J(\text{H,H}) = 6.56$  Hz), 2.62 (s, 3 H), 3.32-3.50 (m, 2 H), 3.62-3.70 (m, 1 H), 3.93 (s, 3 H), 4.23 (d, 1 H,  $J(\text{H,H}) = 9.64$  Hz), 6.28 (s, 1 H), 6.93-6.97 (m, 2 H), 7.28-7.34 (m, 3 H), 7.40 (d, 2 H,  $J(\text{H,H}) = 7.62$  Hz);  $^{13}\text{C-NMR}$  ( $\text{CDCl}_3$ , 101 MHz)  $\delta$  12.3, 15.0, 15.6, 34.4, 43.6, 55.9, 59.6, 109.4, 112.7, 121.4, 128.3, 130.8, 133.4, 134.7, 136.7, 137.5, 150.2, 155.5, 161.5, 165.8, 174.4; HRMS  $m/z$  calc. for  $\text{C}_{23}\text{H}_{25}\text{ClN}_5\text{O}_2$   $[\text{M}+\text{H}^+]$  438.1691, found 438.1684.

**(+)-(R)-2-((S)-6-(4-chlorophenyl)-9-methoxy-1-methyl-4H-benzo[f][1,2,4]triazolo[4,3-a][1,4]diazepin-4-yl)-N-ethylbutanamide (22)**

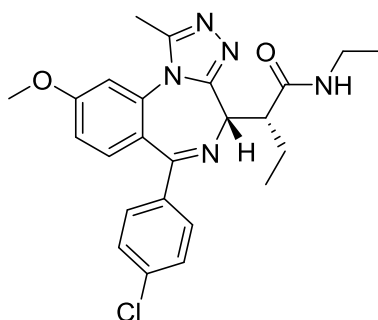

Yield: 9.5 mg (21 %);  $^1\text{H-NMR}$  ( $\text{CDCl}_3$ , 400 MHz)  $\delta$  1.03 (t, 3 H,  $J(\text{H,H}) = 7.24$  Hz), 1.24 (t, 3 H,  $J(\text{H,H}) = 7.24$  Hz), 1.70-1.78 (m, 1 H), 1.96-2.06 (m, 1 H), 2.64 (s, 3 H), 3.41-3.48 (m, 3 H), 3.94 (s, 3 H), 4.26 (d, 1 H,  $J(\text{H,H}) = 9.32$  Hz), 6.43 (s, 1 H), 6.97-6.99 (m, 2 H), 7.31-7.34 (m, 3 H), 7.42 (d, 2 H,  $J(\text{H,H}) = 7.94$  Hz);  $^{13}\text{C-NMR}$  ( $\text{CDCl}_3$ , 101 MHz)  $\delta$  11.9, 12.2, 15.0, 23.2, 34.4, 50.9, 56.0, 58.4, 109.4, 113.3, 121.2, 128.4, 130.9, 133.5, 134.4, 137.0, 137.3, 150.5, 155.5, 161.8, 173.7; HRMS  $m/z$  calc. for  $\text{C}_{24}\text{H}_{27}\text{ClN}_5\text{O}_2$   $[\text{M}+\text{H}^+]$  452.1848, found 452.1855.

#### General procedure for *tert*-butyl ester formation:

The mixture of diastereoisomers of the alkylated methyl-esters (100  $\mu\text{mol}$ , 1 eq.) were hydrolyzed in methanol (0.5 ml) and aqueous sodium hydroxide (0.5 ml, 1 M in water) by heating to 100  $^\circ\text{C}$  for 30 min in a microwave reactor. After quenching with aqueous hydrochloric acid (1 M) the reaction mixture was extracted three times with dichloromethane. The combined organic phases were dried over magnesium sulfate and evaporated to dryness. The crude was dissolved in anhydrous dichloromethane and *tert*-butyl trichloroacetimidate (200  $\mu\text{mol}$ , 2 eq.) was added. After addition of boron trifluoride-diethyl ether complex (5  $\mu\text{mol}$ , 0.05 eq.) the reaction mixture was stirred at 25  $^\circ\text{C}$  for 18 h. The solvent was removed and the residue subject to flash column chromatography before the diastereoisomers were separated as described above.

***tert*-butyl (R)-2-((S)-6-(4-chlorophenyl)-8-methoxy-1-methyl-4H-benzo[f][1,2,4]triazolo[4,3-a][1,4]diazepin-4-yl)butanoate (23).**

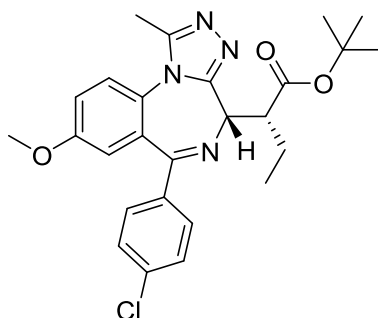

Yield: 3.21 mg (7 %);  $^1\text{H-NMR}$  ( $\text{CDCl}_3$ , 400 MHz)  $\delta$  1.04 (t, 3 H,  $J(\text{H,H})=7.40$ ), 1.56 (s, 9 H), 1.58-1.63 (m, 1 H), 2.11-2.18 (m, 1 H), 2.59 (s, 3 H), 3.81 (s, 3 H), 3.84-3.90 (m, 1 H), 4.19 (d, 1 H,  $J(\text{H,H})=11.1$ ), 6.88 (d, 1 H,  $J(\text{H,H})=2.7$ ), 7.20 (dd, 1 H,  $J(\text{H,H})=2.9$ ,  $J(\text{H,H})=8.98$ ), 7.30-7.32 (m, 2H), 7.38-7.40 (m, 1 H), 7.46-7.48 (m, 2 H);  $^{13}\text{C-NMR}$  ( $\text{CDCl}_3$ , 101 MHz)  $\delta$  11.6, 12.3, 23.5, 28.5, 50.2, 56.0, 59.1, 80.7, 115.7, 118.0, 124.9, 126.6, 128.5, 128.8, 130.2, 130.9, 137.0, 137.2, 150.4, 155.5, 158.1, 165.2, 174.2; HRMS  $m/z$  calc. for  $\text{C}_{26}\text{H}_{30}\text{ClN}_4\text{O}_3$   $[\text{M}+\text{H}^+]$  481.2001, found 481.2009.

**tert-butyl (R)-2-((S)-6-(4-chlorophenyl)-8-methoxy-1-methyl-4H-benzo[f][1,2,4]triazolo[4,3-a][1,4]diazepin-4-yl)pent-4-enoate (24).**

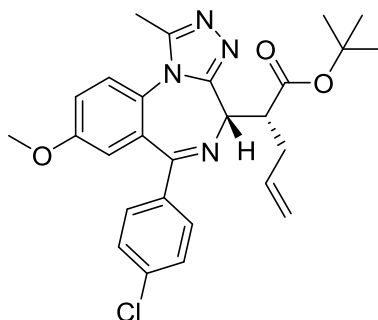

Yield: 5.20 mg (11 %);  $^1\text{H-NMR}$  ( $\text{CDCl}_3$ , 400 MHz)  $\delta$  1.52 (s, 9 H), 2.35-2.43 (m, 1 H), 2.60 (s, 3 H), 2.85-2.90 (m, 1 H), 3.81 (s, 3 H), 3.99 (dt, 1 H,  $J(\text{H,H})=3.7$ ,  $J(\text{H,H})=10.5$ ), 4.22 (d, 1 H,  $J(\text{H,H})=11.0$ ), 4.98-5.05 (m, 2 H), 5.83-5.93 (m, 1 H), 6.88 (d, 1 H,  $J(\text{H,H})=2.8$ ), 7.20 (dd, 1 H,  $J(\text{H,H})=2.8$ ,  $J(\text{H,H})=8.8$ ), 7.30-7.32 (m, 2 H), 7.38-7.40 (m, 1 H), 7.46-7.48 (m, 2 H);  $^{13}\text{C-NMR}$  ( $\text{CDCl}_3$ , 101 MHz)  $\delta$  12.3, 28.4, 34.7, 48.3, 56.0, 58.6, 81.0, 115.8, 117.2, 118.0, 124.9, 126.6, 128.6, 130.1, 130.9, 134.7, 137.0, 137.1, 150.4, 155.2, 158.1, 165.3, 173.4; HRMS  $m/z$  calc. for  $\text{C}_{27}\text{H}_{30}\text{ClN}_4\text{O}_3$   $[\text{M}+\text{H}^+]$  493.2001, found 493.2021.

**tert-butyl (R)-2-((S)-6-(4-chlorophenyl)-9-methoxy-1-methyl-4H-benzo[f][1,2,4]triazolo[4,3-a][1,4]diazepin-4-yl)butanoate (25)**

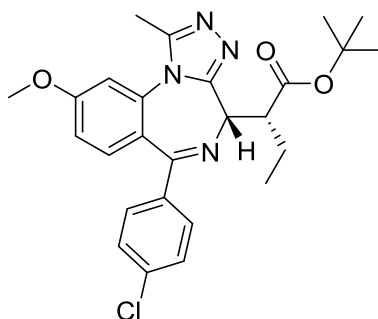

$^1\text{H NMR}$  (400 MHz,  $\text{CDCl}_3$ ) 1.04 (t,  $J=7.6$  Hz, 3H), 1.55-1.63 (m, 11H), 2.11-2.18 (m, 1H), 2.62 (s, 3H), 3.81-3.87 (m, 1H), 3.95 (s, 3H), 4.18 (d,  $J=11.1$  Hz, 1H), 6.93 (d,  $J=2.2$  Hz, 1H), 6.98 (dd,  $J=2.5$ , 8.7 Hz, 1H), 7.30 (d,  $J=8.5$  Hz, 2H), 7.36 (d,  $J=8.7$  Hz, 1H), 7.43 (d,  $J=8.7$  Hz, 2H).  $^{13}\text{C-NMR}$  ( $\text{CDCl}_3$ , 500 MHz) 11.5, 12.4, 23.4, 28.3, 50.2, 55.9, 58.9, 80.6, 109.4, 112.7, 121.5, 128.3, 130.9, 133.3, 134.8, 136.7, 137.5, 150.1, 155.3, 161.5, 165.4, 174.0; HRMS  $m/z$  calc. for  $\text{C}_{26}\text{H}_{30}\text{ClN}_4\text{O}_3$   $[\text{M}+\text{H}^+]$  481.2006, found 481.2015

**tert-butyl (R)-2-((S)-6-(4-chlorophenyl)-9-methoxy-1-methyl-4H-benzo[f][1,2,4]triazolo[4,3-a][1,4]diazepin-4-yl)pent-4-enoate (26)**

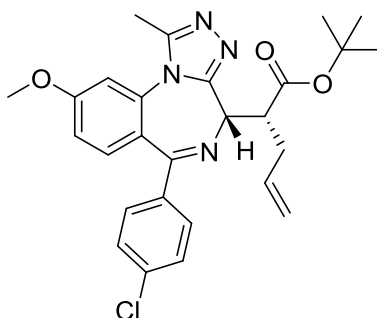

<sup>1</sup>H NMR (CDCl<sub>3</sub>, 500 MHz) 1.52 (s, 9H), 2.36-2.43 (m, 1H), 2.64 (s, 3H), 2.86-2.91 (m, 1H), 3.95 (s, 3H), 3.96-4.02 (m, 1H), 4.22 (d, J=11.0 Hz, 1H), 4.98-5.07 (m, 2H), 5.85-5.94 (m, 1H), 6.93 (d, J=2.4 Hz, 1H), 6.98 (dd, J=2.5, 8.8 Hz, 1H), 7.30 (d, J=8.4 Hz, 2H), 7.37 (d, J=8.7 Hz, 1H), 7.43 (d, J=8.7 Hz, 2H). <sup>13</sup>C-NMR (CDCl<sub>3</sub>, 500 MHz) 12.4, 28.3, 34.6, 48.3, 55.9, 58.4, 80.8, 109.4, 112.7, 117.0, 121.5, 128.4, 130.9, 133.3, 134.7, 134.8, 136.7, 137.5, 150.1, 155.1, 161.5, 165.5, 173.2; HRMS m/z calc. for C<sub>27</sub>H<sub>30</sub>ClN<sub>4</sub>O<sub>3</sub> [M+H<sup>+</sup>] 493.2006, found 493.2025

### Chiral HPLC separation of compound 7

Racemate 7 was dissolved to 20 mg/mL in ethanol and was then purified by HPLC. Combined fractions of each of UD5\_1 and UD5\_2 were then evaporated to near dryness using a rotary evaporator, transferred into final vessels with DCM, which was removed under a stream of nitrogen at 40°C before being stored in a vacuum oven at 40°C and 5mbar for 16 hours to afford UD5\_1 and UD5\_2 as off white glasses.

Column Details: Lux A1 (21.2mm x 250mm, 5µm)

Column Temperature: Ambient

Flow Rate: 21 mL/min

Detector Wavelength: 220 nm

Injection Volume: 1000 µL (20 mg)

Isocratic Conditions 4:6 HEPT:EtOH (0.1% v/v NH<sub>3</sub>)A)

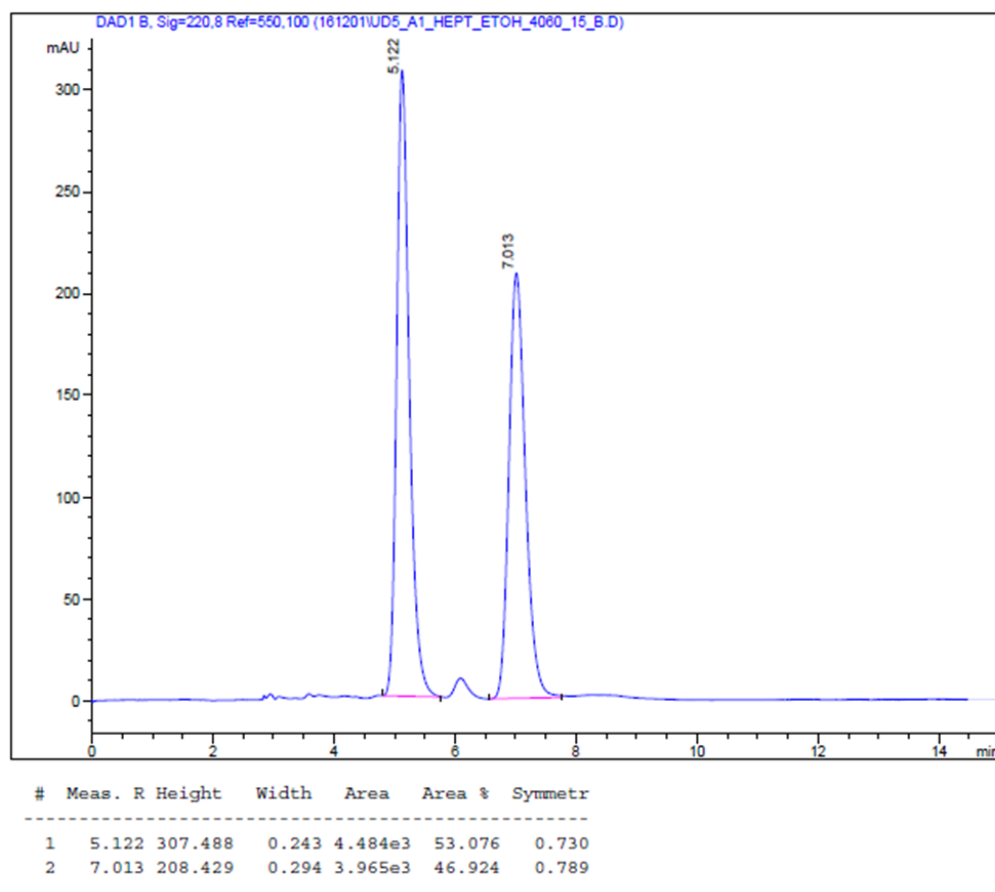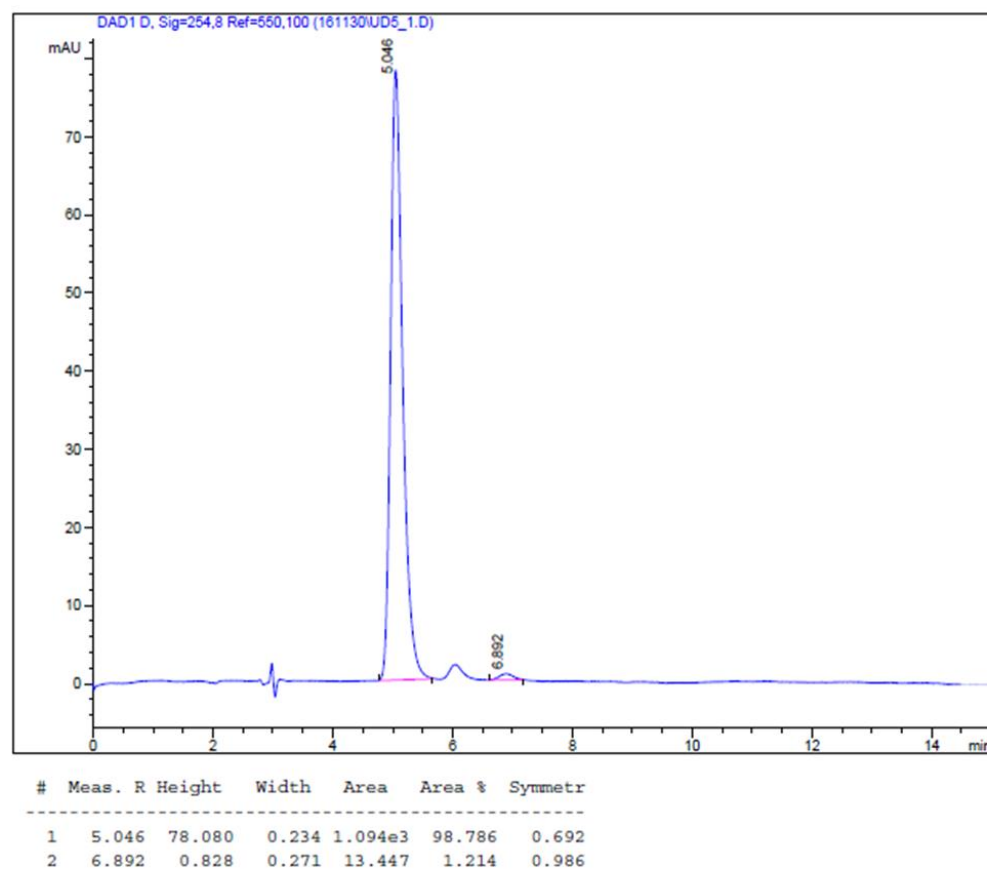

B)

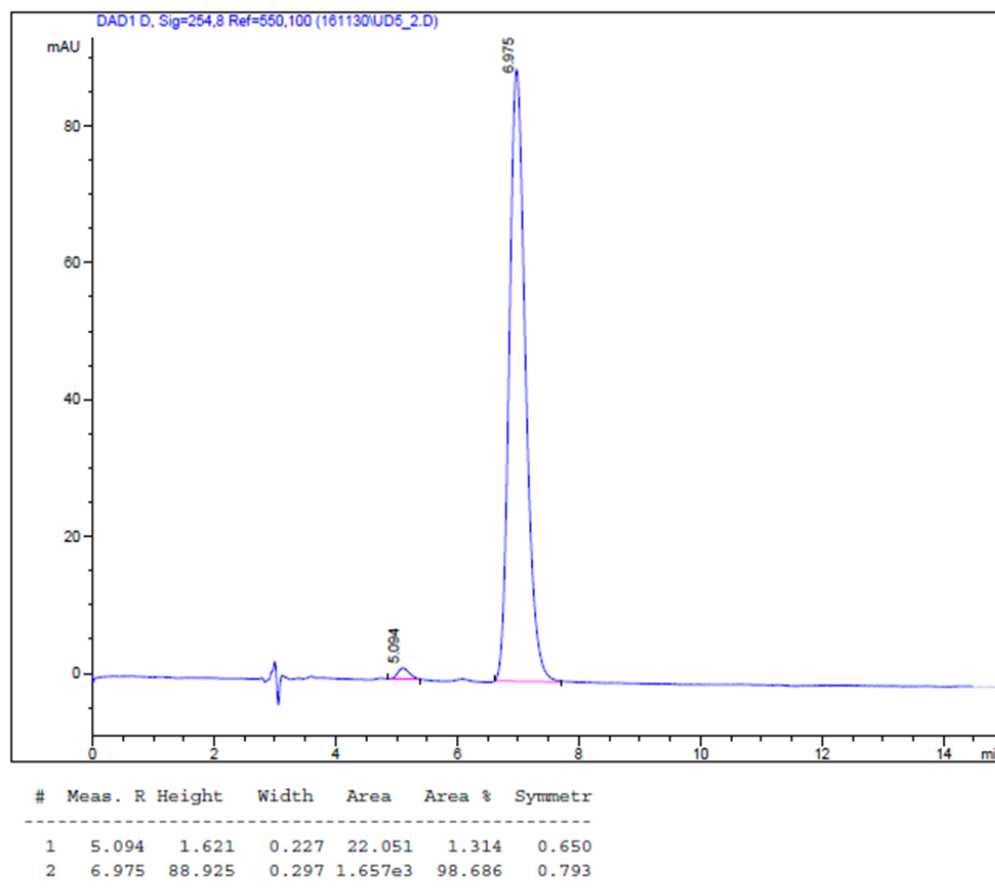

**C)**

HPLC traces of A) 7 racemate (7), B) (2R, 3S)-7, C) (2S,3R)-7

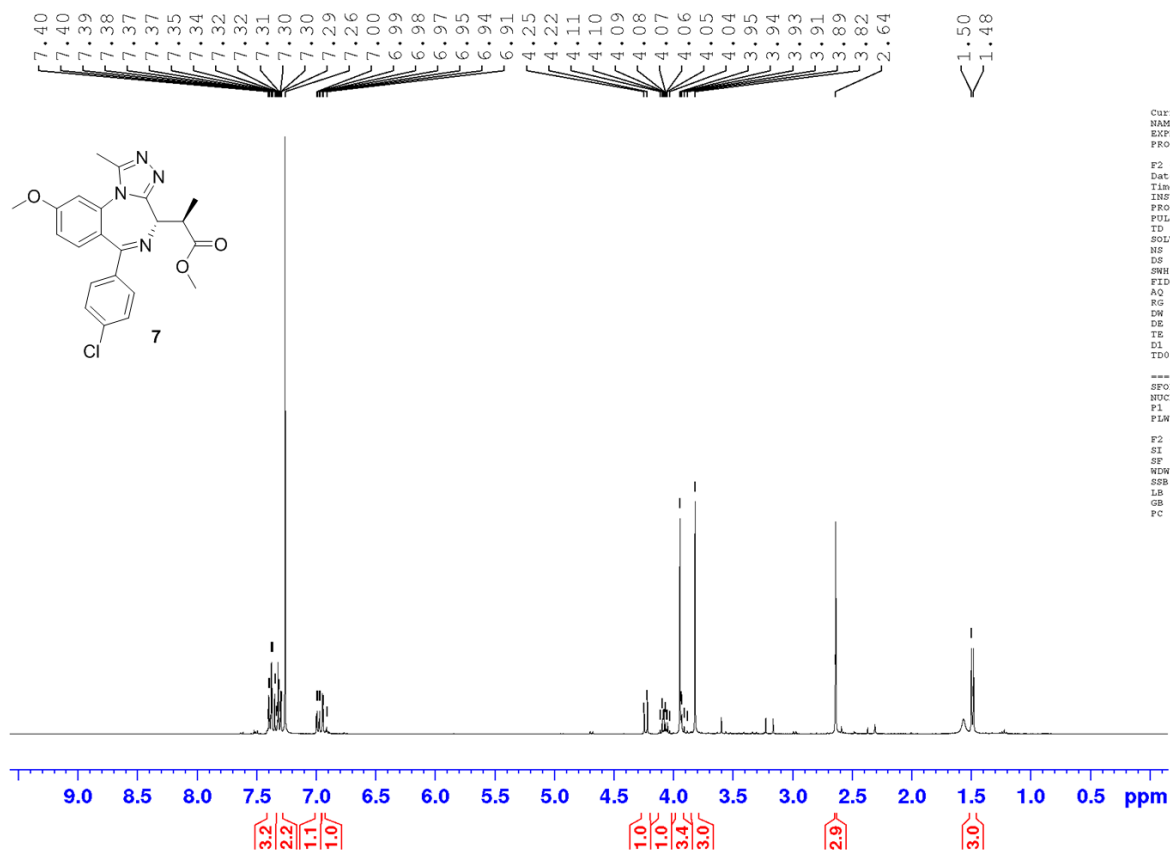

UNIVERSITY OF  
DUNDEE

Current Data Parameters  
NAME ALC-DAT332\_3  
EXPNO 10  
PROCNO 1

F2 - Acquisition Parameters  
Date\_ 20161109  
Time 10.55  
INSTRUM spect  
PROBHD 5 mm PADOL 13C  
PULPROG zg30  
TD 131072  
SOLVENT CDCl<sub>3</sub>  
NS 120  
DS 4  
SWH 12019.230 Hz  
FIDRES 0.091699 Hz  
AQ 5.4525952 sec  
RG 196.14  
DW 41.600 usec  
DE 12.17 usec  
TE 298.1 K  
D1 0.10000000 sec  
TD0 1

----- CHANNEL f1 -----  
SF01 400.1324710 MHz  
NUC1 1H  
P1 10.00 usec  
PLW1 20.00000000 W

F2 - Processing parameters  
SI 131072  
SF 400.1300097 MHz  
WDW EM  
SSB 0  
LB 0.10 Hz  
GB 0  
PC 1.00

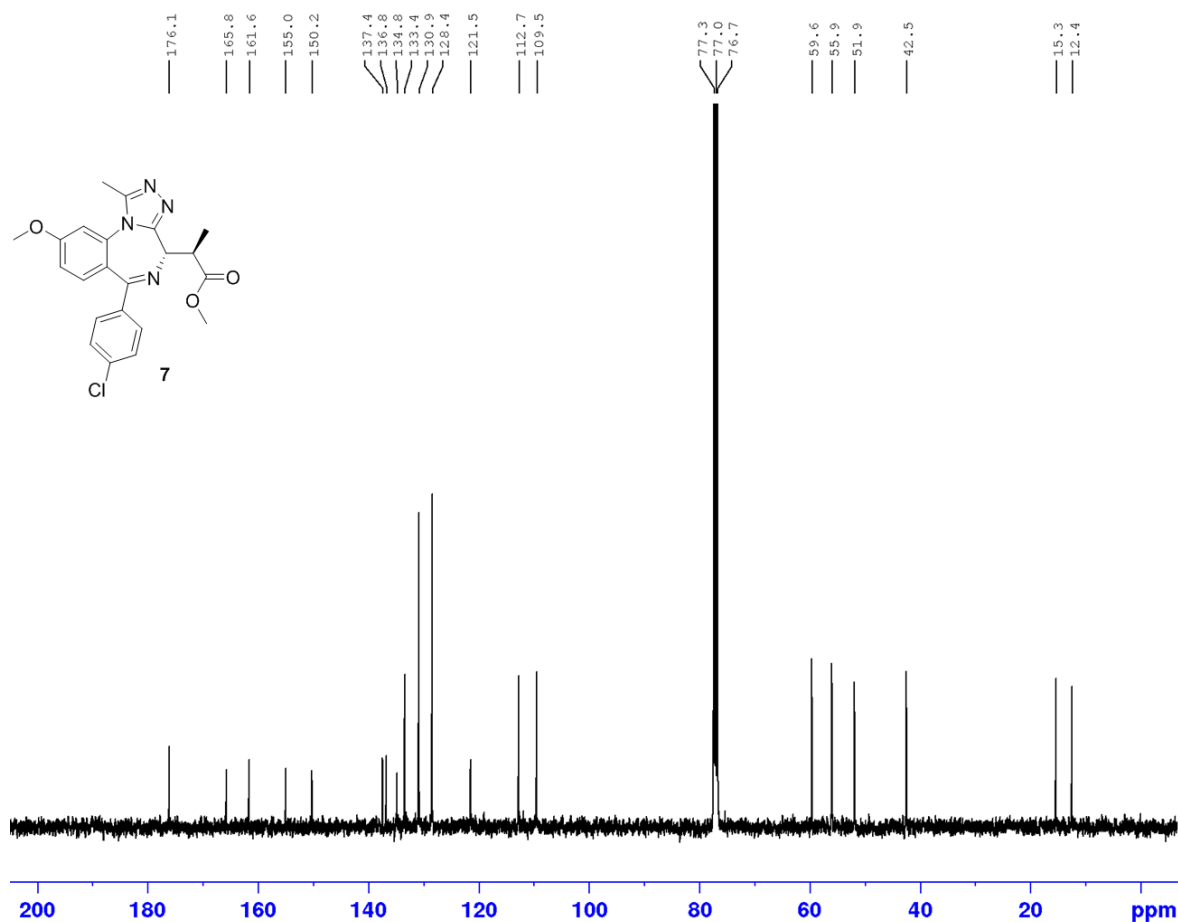

UNIVERSITY OF  
DUNDEE

Current Data Parameters  
NAME ALC-DAT332\_3  
EXPNO 11  
PROCNO 1

F2 - Acquisition Parameters  
Date\_ 20161109  
Time 1.25  
INSTRUM spect  
PROBHD 5 mm PADOL 13C  
PULPROG udeft  
TD 17996  
SOLVENT CDCl<sub>3</sub>  
NS 6000  
DS 0  
SWH 25000.000 Hz  
FIDRES 1.389198 Hz  
AQ 0.3599200 sec  
RG 196.14  
DW 20.000 usec  
DE 8.66 usec  
TE 298.1 K  
D1 3.00000000 sec  
D11 0.03000000 sec  
D12 0.00002000 sec  
D20 200.00000000 sec  
TD0 1

----- CHANNEL f1 -----  
SF01 100.6238346 MHz  
NUC1 13C  
P1 10.00 usec  
PL1 2000.00 usec  
P2 600.00 usec  
PLW1 36.00000000 W  
SPNAM[5] Crp60comp.4  
SFOAL5 0.500  
SFOFFS5 0 Hz  
SPW5 5.50040007 W  
SPNAM[8] Crp60,0.5,20.1  
SFOAL8 0.500  
SFOFFS8 0 Hz  
SPW8 5.50040007 W

----- CHANNEL f2 -----  
SF02 400.1316005 MHz  
NUC2 1H  
CPDPRG2 waltz64  
PCPD2 90.00 usec  
PLW2 20.00000000 W  
PLW12 0.24691001 W

F2 - Processing parameters  
SI 262144  
SF 100.6127665 MHz  
WDW EM  
SSB 0  
LB 2.00 Hz  
GB 0  
PC 1.40

<sup>1</sup>H and <sup>13</sup>C NMR spectra of 7 S\*R\* diastereomer

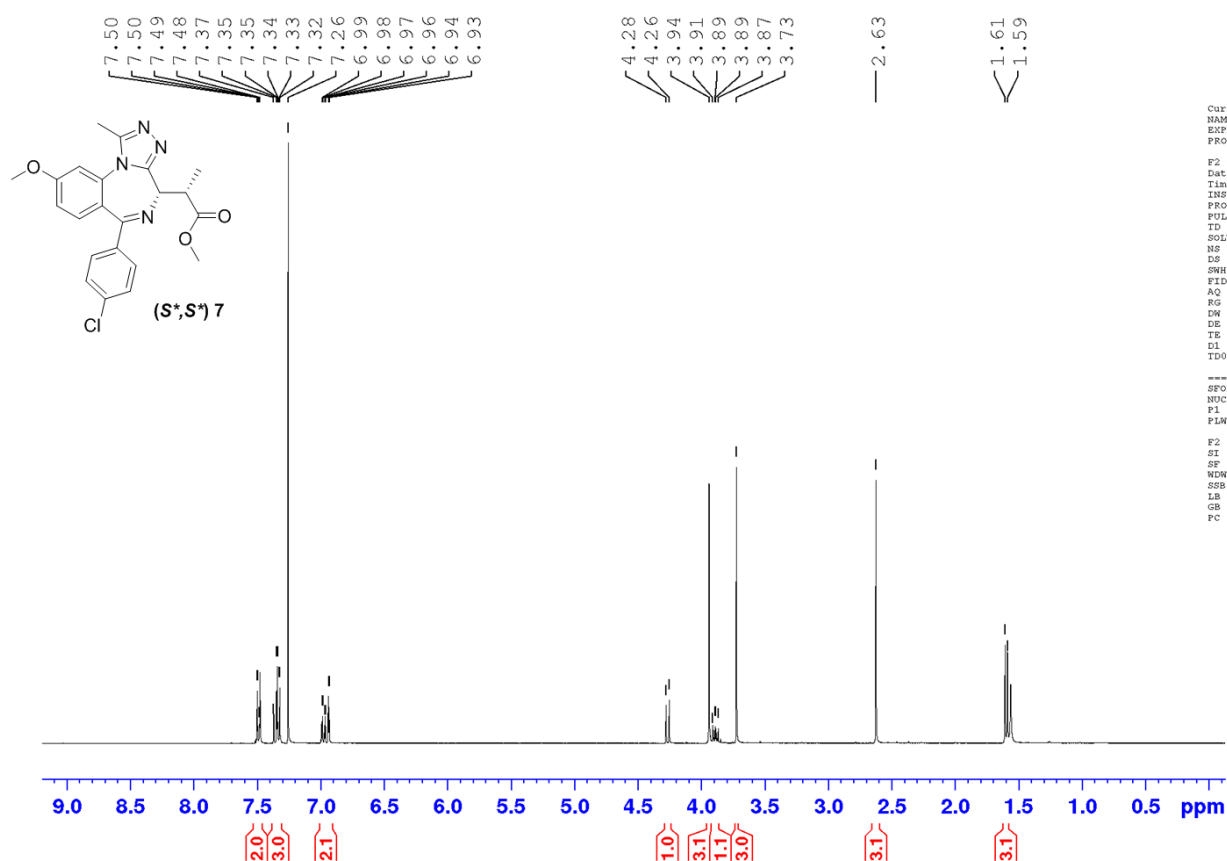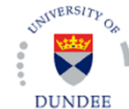

Current Data Parameters  
 NAME ALC-DAT332\_4  
 EXPNO 10  
 PROCNO 1

F2 - Acquisition Parameters  
 Date\_ 20161108  
 Time 11.09  
 INSTRUM spect  
 PROBHD 5 mm PADUL 13C  
 PULPROG zg30  
 TD 131072  
 SOLVENT CDCl3  
 NS 120  
 DS 4  
 SWH 12019.230 Hz  
 FIDRES 0.091699 Hz  
 AQ 5.452552 sec  
 RG 196.14  
 DW 41.600 usec  
 DE 12.17 usec  
 TE 298.2 K  
 D1 0.1000000 sec  
 TD0 1

===== CHANNEL f1 =====  
 SFO1 400.1324710 MHz  
 NUC1 1H  
 P1 10.00 usec  
 PLW1 20.0000000 W

F2 - Processing parameters  
 SI 131072  
 SF 400.1300096 MHz  
 WDW EM  
 SSB 0  
 LB 0.10 Hz  
 GB 0  
 PC 1.00

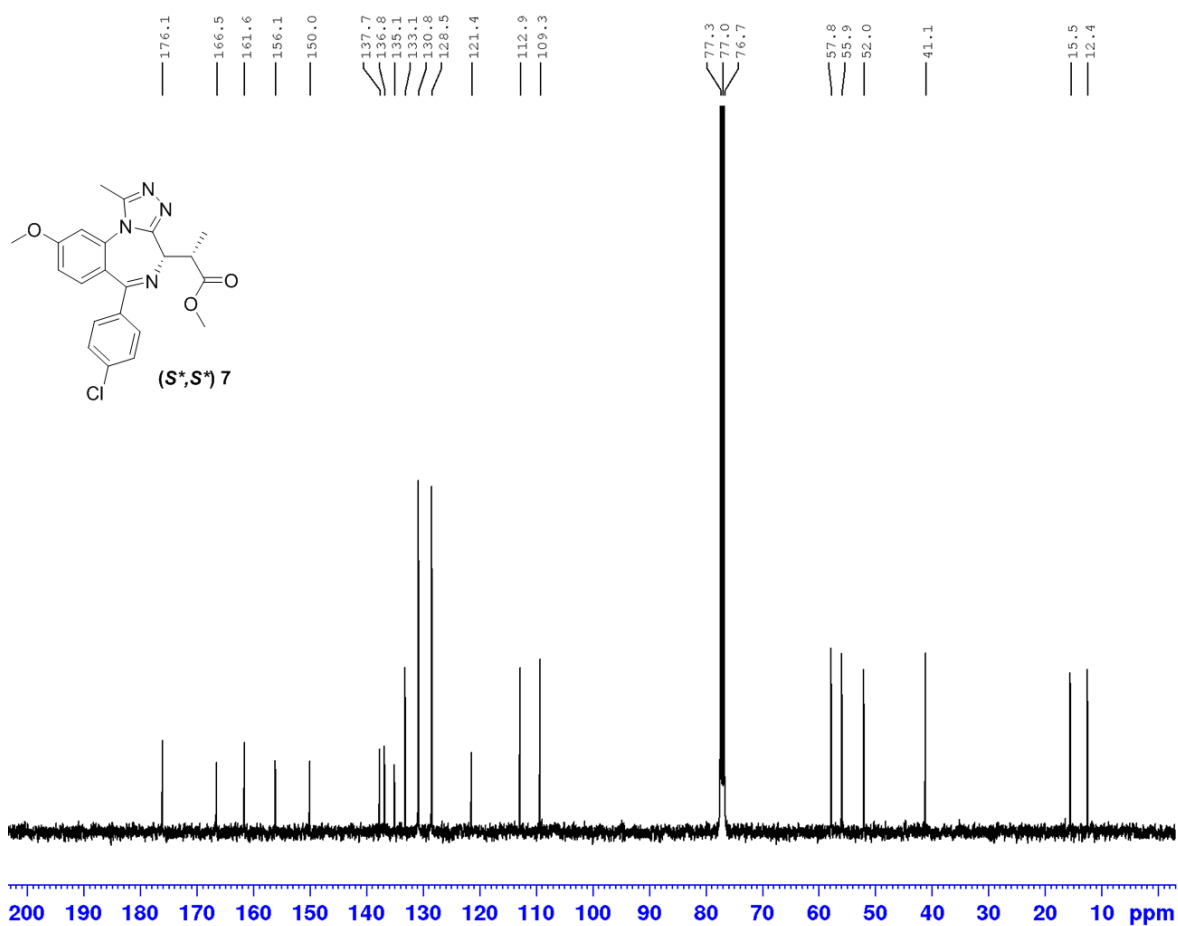

Current Data Parameters  
 NAME ALC-DAT332\_4  
 EXPNO 11  
 PROCNO 1

F2 - Acquisition Parameters  
 Date\_ 20161109  
 Time 7.49  
 INSTRUM spect  
 PROBHD 5 mm PADUL 13C  
 PULPROG udefr  
 TD 17996  
 SOLVENT CDCl3  
 NS 6000  
 DS 0  
 SWH 25000.000 Hz  
 FIDRES 1.389198 Hz  
 AQ 0.3599200 sec  
 RG 196.14  
 DW 20.000 usec  
 DE 8.66 usec  
 TE 298.2 K  
 D1 3.00000000 sec  
 D11 0.03000000 sec  
 D12 0.00002000 sec  
 D20 200.00000000 sec  
 TD0 1

===== CHANNEL f1 =====  
 SFO1 100.6238346 MHz  
 NUC1 13C  
 P1 10.00 usec  
 P13 2000.00 usec  
 P26 500.00 usec  
 PLW1 36.00000000 W  
 SPNAM[5] Crp60comp.4  
 SFOALS 0.500  
 SPOFFS5 0 Hz  
 SPM5 5.50040007 W  
 SPNAM[8] Crp60,0.5,20.1  
 SFOALS 0.500  
 SPOFFS8 0 Hz  
 SPM8 5.50040007 W

===== CHANNEL f2 =====  
 SFO2 400.1316005 MHz  
 NUC2 1H  
 CEDPRG2 waltz64  
 FCFD2 90.00 usec  
 PLW2 20.00000000 W  
 PLW12 0.24691001 W

F2 - Processing parameters  
 SI 262144  
 SF 100.6127685 MHz  
 WDW EM  
 SSB 0  
 LB 2.00 Hz  
 GB 0  
 PC 1.40

<sup>1</sup>H and <sup>13</sup>C NMR spectra of 7 S\*S\* diastereomer

### **Supplemental References**

1. F. Gong, L. Y. Chiu, B. Cox, F. Aymard, T. Clouaire, J. W. Leung, M. Cammarata, M. Perez, P. Agarwal, J. S. Brodbelt, G. Legube and K. M. Miller, *Genes Dev*, 2015, 29, 197-211.
2. F. H. Niesen, H. Berglund and M. Vedadi, *Nat Protoc*, 2007, 2, 2212-2221.
3. W. Kabsch, *Acta Crystallogr D Biol Crystallogr*, 2010, 66, 125-132.
4. T. G. Battye, L. Kontogiannis, O. Johnson, H. R. Powell and A. G. Leslie, *Acta Crystallogr D Biol Crystallogr*, 2011, 67, 271-281.
5. P. R. Evans and G. N. Murshudov, *Acta Crystallogr D Biol Crystallogr*, 2013, 69, 1204-1214.
6. M. D. Winn, C. C. Ballard, K. D. Cowtan, E. J. Dodson, P. Emsley, P. R. Evans, R. M. Keegan, E. B. Krissinel, A. G. Leslie, A. McCoy, S. J. McNicholas, G. N. Murshudov, N. S. Pannu, E. A. Potterton, H. R. Powell, R. J. Read, A. Vagin and K. S. Wilson, *Acta Crystallogr D Biol Crystallogr*, 2011, 67, 235-242.
7. A. Vagin and A. Teplyakov, *Acta Crystallogr D Biol Crystallogr*, 2010, 66, 22-25.
8. A. J. McCoy, R. W. Grosse-Kunstleve, P. D. Adams, M. D. Winn, L. C. Storoni and R. J. Read, *J Appl Crystallogr*, 2007, 40, 658-674.
9. P. V. Afonine, R. W. Grosse-Kunstleve, N. Echols, J. J. Headd, N. W. Moriarty, M. Mustyakimov, T. C. Terwilliger, A. Urzhumtsev, P. H. Zwart and P. D. Adams, *Acta Crystallogr D Biol Crystallogr*, 2012, 68, 352-367.
10. P. D. Adams, P. V. Afonine, G. Bunkoczi, V. B. Chen, I. W. Davis, N. Echols, J. J. Headd, L. W. Hung, G. J. Kapral, R. W. Grosse-Kunstleve, A. J. McCoy, N. W. Moriarty, R. Oeffner, R. J. Read, D. C. Richardson, J. S. Richardson, T. C. Terwilliger and P. H. Zwart, *Acta Crystallogr D Biol Crystallogr*, 2010, 66, 213-221.
11. P. Emsley, B. Lohkamp, W. G. Scott and K. Cowtan, *Acta Crystallogr D Biol Crystallogr*, 2010, 66, 486-501.
12. N. W. Moriarty, R. W. Grosse-Kunstleve and P. D. Adams, *Acta Crystallogr D Biol Crystallogr*, 2009, 65, 1074-1080.
13. N. W. Moriarty, E. J. Draizen and P. D. Adams, *Acta Crystallogr D Struct Biol*, 2017, 73, 123-130.
14. A. W. Schuttelkopf and D. M. van Aalten, *Acta Crystallogr D Biol Crystallogr*, 2004, 60, 1355-1363.
15. V. B. Chen, W. B. Arendall, 3rd, J. J. Headd, D. A. Keedy, R. M. Immormino, G. J. Kapral, L. W. Murray, J. S. Richardson and D. C. Richardson, *Acta Crystallogr D Biol Crystallogr*, 2010, 66, 12-21.
16. The PyMol Molecular Graphics System Schrodinger, LLC,
